# Supplementary material
Source: PubMed Central journal article supplement (PMC5775921)
Supplement: NIHMS913692-supplement-Supplemental.pdf [file NIHMS913692-supplement-Supplemental.pdf]

## **Supporting information**

### **Peptide Ligands for Targeting the Extracellular Domain of EGFR: Comparison Between Linear and Cyclic Peptides.**

Tyrslai M. Williams<sup>2\*\*</sup>, Rushikesh Sable<sup>1\*\*</sup>, Sitanshu Singh<sup>1</sup>, M. Graça H. Vicente<sup>2</sup>, Seetharama Jois<sup>1\*</sup>

<sup>1</sup>Basic Pharmaceutical Sciences, School of Pharmacy, University of Louisiana at Monroe, Monroe LA 71201, USA

<sup>2</sup>Department of Chemistry, Louisiana State University, Baton Rouge LA 70803, USA

**Table 1.** Chemical shift, coupling constant and temperature dependence of amide resonances of  $^1\text{H}$  NMR resonances for CycloL1 in DMSO- $d_6$ .

| Sequence | Chemical shift in ppm ( $\delta$ ) |      |      |      |       | $\Delta\delta\Delta/T$ ppb/K | $^3J_{\text{HN}\alpha}$ |
|----------|------------------------------------|------|------|------|-------|------------------------------|-------------------------|
|          | NH                                 | CH   | CH   | CH   | Other |                              |                         |
| K1       | 7.78                               | 4.26 | 1.63 | 1.54 |       | N.D                          | N.D                     |
| L2       | 8.30                               | 4.22 | 1.73 | 1.49 | 0.88  | 3.5                          | ↓                       |
| A3       | 8.10                               | 4.06 | 1.26 |      |       | 4.9                          | ↓                       |
| R4       | 8.42                               | 3.69 | 1.85 | 1.47 | 3.14  | 4                            | ↓                       |
| L5       | 7.79                               | 4.34 | 1.62 | 1.54 | 0.85  | 2.6                          | ↓                       |
| L6       | 7.77                               | 4.15 | 1.63 | 1.55 | 0.86  | 2.3                          | ↓                       |
| T7       | 8.50                               | 4.27 | 3.90 | 1.04 |       | 4.3                          | ↑                       |

\*Upside arrows represent the coupling constant  $\geq 6$  Hz and downward arrows indicate coupling constants  $\leq 5$ Hz. N.D not determined.

**Table 2.** Chemical shift, coupling constant and temperature dependence of amide resonances of of <sup>1</sup>H NMR resonances for CycloL1.1 in DMSO-d<sub>6</sub>.

| Sequence | Chemical shift in ppm ( $\delta$ ) |      |      |      |       | $\Delta\delta\Delta/T$ ppb/K | <sup>3</sup> J <sub>H<math>\alpha</math></sub> |
|----------|------------------------------------|------|------|------|-------|------------------------------|------------------------------------------------|
|          | NH                                 | CH   | CH   | CH   | Other |                              |                                                |
| K1       | 8.04                               | 3.93 | 1.75 | 1.49 | 3.11  | 5.1                          | ↑                                              |
| l2       | 8.22                               | 4.33 | 1.64 | 1.50 | 0.88  | 4.3                          | ↓                                              |
| a3       | 7.59                               | 4.01 | 1.07 |      |       | 5.1                          | ↓                                              |
| r4       | 8.16                               | 4.09 | 1.81 | 1.57 |       | 5.7                          | ↑                                              |
| l5       | 7.90                               | 4.05 | 1.82 | 1.60 | 0.89  | 4.8                          | ↑                                              |
| l6       | 7.90                               | 4.33 | 1.64 | 1.50 | 0.88  | 0.7                          | ↑                                              |
| t7       | 8.23                               | 4.16 | 1.35 |      |       | 3.3                          | ↓                                              |

\*Upside arrows represent the coupling constant  $\geq 6$  Hz and downward arrows indicate coupling constants  $\leq 5$ Hz. L amino acid is represented by capital letter and D amino acids by small letter.

**Table 3.** <sup>1</sup>H NMR NOESY data with cross-peak connectivities indicating spatial connectivities between the protons for **Cyclo.L1**.

| Connectivity between the protons |                            | Connectivity between the protons |                      |
|----------------------------------|----------------------------|----------------------------------|----------------------|
| $\alpha\text{N (i,i)}$           |                            | $\beta\text{N (i,i)}$            |                      |
| K1NH                             | K1 $\alpha$ H              | K1NH                             | K1 $\beta$ H         |
| L2NH                             | L2 $\alpha$ H              | L2NH                             | L2 $\beta$ H         |
| A3NH                             | A3 $\alpha$ H              | A3NH                             | A3 $\beta$ H         |
| R4NH                             | R4 $\alpha$ H              | R4NH                             | R4 $\beta$ H         |
| L5NH                             | L5 $\alpha$ H              | L5NH                             | L5 $\beta$ H         |
| L6NH                             | L6 $\alpha$ H              | L6NH                             | L6 $\beta$ H         |
| T7NH                             | T7 $\alpha$ H              | T7NH                             | T7 $\beta$ H         |
| $\alpha\text{N (i,i+1)}$         |                            | Other                            |                      |
| K1 $\alpha$ H                    | L2NH                       | K1NH                             | K1 $\gamma$ H        |
| L2 $\alpha$ H                    | A3NH                       | L2NH                             | L2 $\gamma$ H        |
| A3 $\alpha$ H                    | R4NH                       | L2NH                             | L2 $\delta$ H        |
| R4 $\alpha$ H                    | L5NH                       | R4NH                             | R4 $\gamma$ H        |
| L6 $\alpha$ H                    | T7NH                       | L5NH                             | L5 $\gamma$ H        |
| NN (i,i+1)                       |                            | L5NH                             | L5 $\delta$ H        |
| T7NH                             | K1NH                       | L6NH                             | L6 $\gamma$ H        |
| R4NH                             | L5NH                       | L6NH                             | L6 $\delta$ H        |
| R4<br>NH(Guanidine)              | L5NH                       | K1 $\alpha$ H                    | K1 $\beta$ H         |
| NH-side chain long range         |                            | L2 $\alpha$ H                    | L2 $\beta$ H         |
| K1NH                             | T7 $\beta$ H               | L2 $\alpha$ H                    | L2 $\gamma$ H        |
| T7NH                             | L6 $\beta$ H               | L2 $\alpha$ H                    | L2 $\delta$ H        |
| R4NH                             | A3 $\beta$ H               | R4 $\alpha$ H                    | R4 $\beta$ H         |
| A3NH                             | L2 $\beta,\gamma,\delta$ H | T7 $\alpha$ H                    | T7 $\beta$ H         |
|                                  |                            | T7 $\alpha$ H                    | T7 $\gamma$ H        |
|                                  |                            | A3 $\alpha$ H                    | A3 $\beta$ H         |
|                                  |                            | L5 $\alpha$ H                    | L5 $\beta, \gamma$ H |

**Table 4.** <sup>1</sup>H NMR NOESY data with cross-peak connectivities indicating spatial connectivities between the protons for **Cyclo.L1.1**.

| Connectivity between the protons    |                     | Connectivity between the protons |               |
|-------------------------------------|---------------------|----------------------------------|---------------|
| <b>N<math>\alpha</math> (i,i)</b>   |                     | <b><math>\beta</math>N (i,i)</b> |               |
| K1NH                                | K1 $\alpha$ H       | K1NH                             | K1 $\beta$ H  |
| l2NH                                | l2 $\alpha$ H       | l2NH                             | l2 $\beta$ H  |
| a3NH                                | a3 $\alpha$ H       | a3NH                             | a3 $\beta$ H  |
| r4NH                                | r4 $\alpha$ H       | r4NH                             | r4 $\beta$ H  |
| l5NH                                | l5 $\alpha$ H       | l5NH                             | l5 $\beta$ H  |
| l6NH                                | l6 $\alpha$ H       | l6NH                             | l6 $\beta$ H  |
| t7NH                                | t7 $\alpha$ H       |                                  |               |
| <b><math>\alpha</math>N (i,i+1)</b> |                     | <b>Other</b>                     |               |
| K1 $\alpha$ H                       | l2NH                | K1NH                             | K1 $\gamma$ H |
| a3 $\alpha$ H                       | r4NH                | l2NH                             | l2 $\gamma$ H |
| r4 $\alpha$ H                       | l5NH                | l2NH                             | l2 $\delta$ H |
| l6 $\alpha$ H                       | t7NH                | r4NH                             | r4 $\gamma$ H |
| t7 $\alpha$ H                       | K1NH                | l5NH                             | l5 $\gamma$ H |
| <b>NN (i,i+1)</b>                   |                     | l5NH                             | l5 $\delta$ H |
| t7NH                                | l6NH                | l6NH                             | l6 $\gamma$ H |
| l2NH                                | K1NH                | l6NH                             | l6 $\delta$ H |
| <b>NN (long range)</b>              |                     | r4 $\alpha$ H                    | r4 $\beta$ H  |
| l2NH                                | l5/6NH              | r4 $\alpha$ H                    | r4 $\gamma$ H |
| K1NH                                | K1 $\epsilon$ H     | l2 $\alpha$ H                    | l2 $\beta$ H  |
| <b>NH-side chain long range</b>     |                     | l2 $\alpha$ H                    | l2 $\gamma$ H |
| K1NH                                | t7 $\beta$ H        | l2 $\alpha$ H                    | l2 $\delta$ H |
| r4NH                                | a3 $\beta$ H        | t7 $\alpha$ H                    | t7 $\gamma$ H |
| a3NH                                | l2 $\beta,\gamma$ H | l6 $\alpha$ H                    | l6 $\beta$ H  |
|                                     |                     | l6 $\alpha$ H                    | l6 $\delta$ H |

\*L amino acids are represented by capital letters and D amino acids are represented by smallletters.

## Figure legends for supporting information

**Figure S1.** HR-MS for Cyclic peptides A) Cyclo(KLARLLT) and B) Cyclo(KN3)larllt).

**Figure S2.** SPR analysis of linear peptide GLARLLT. EGFR was immobilized on CM5 sensor chip and different concentrations of peptide was injected to obtain the SPR response. Binding of peptide GLARLLT to EGFR was observed with increasing concentration of the peptide.

**Figure S3.** Curve fitting of SPR sensorgram for **Cyclo.L1.1** using 1:1 Langmuir interaction describing the single exponential of the data. Black lines are experimental data and different colored lines represent fitted lines.  $K_D$  values reported were from  $k_{on}$  and  $k_{off}$  calculations.

**Figure S4.** Curve fitting of SPR sensorgram for **L1.7** using 1:1 Langmuir interaction describing the single exponential of the data. Black lines are experimental data and different colored lines represent fitted lines.

**Figure S5.** HPLC for peptide **L1**.

**Figure S6.** HPLC for peptide **L1.3**.

**Figure S7.** HPLC for peptide **L1.4**.

**Figure S8.** HPLC for peptide **L1.5**.

**Figure S9.** HPLC for peptide **L1.6**.

**Figure S10.** HPLC for peptide **L1.7**.

**Figure S11.** HPLC for peptide **L1**

**Figure S12.** MALDI-TOF of peptide **L1.3**

**Figure S13.** MALDI-TOF of peptide **L1.5**

**Figure S14.** MALDI-TOF of peptide **L1.6**

**Figure S15.** MALDI-TOF of peptide **L1.7**

**Figure S16.** MALDI-TOF-TOF (MSMS) of peptide **L1**

**Figure S17.** MALDI-TOF-TOF (MSMS) of peptide **L1.3**

**Figure S18.** MALDI-TOF-TOF (MSMS) of peptide **L1.5**

**Figure S19.** MALDI-TOF-TOF (MSMS) of peptide **L1.6**

**Figure S20.** MALDI-TOF-TOF (MSMS) of peptide **L1.7**

**Figure S21.**  $^1\text{H}$ NMR spectrum for peptide **L1**.

**Figure S22.**  $^1\text{H}$ NMR spectrum for peptide **L1.1**.

**Figure S23.**  $^1\text{H}$ NMR spectrum for peptide **L1.2**.

**Figure S24.**  $^1\text{H}$ NMR spectrum for peptide **L1.3**.

**Figure S25.**  $^1\text{H}$ NMR spectrum for peptide **L1.4**.

**Figure S26.**  $^1\text{H}$ NMR spectrum for peptide **L1.5**.

**Figure S27.**  $^1\text{H}$ NMR spectrum for peptide **L1.6**.

**Figure S28.**  $^1\text{H}$ NMR spectrum for peptide **L1.7**.

**Figure S29.** HSQC spectrum for peptide **L1**.

**Figure S30.** HSQC spectrum for peptide **L1.5**.

**Figure S31.** CD spectra of linear and cyclic peptides in methanol. 1 mg/mL of peptide was dissolved in methanol and CD spectra was acquired at 25 °C, and the spectra were average of 4 scans.

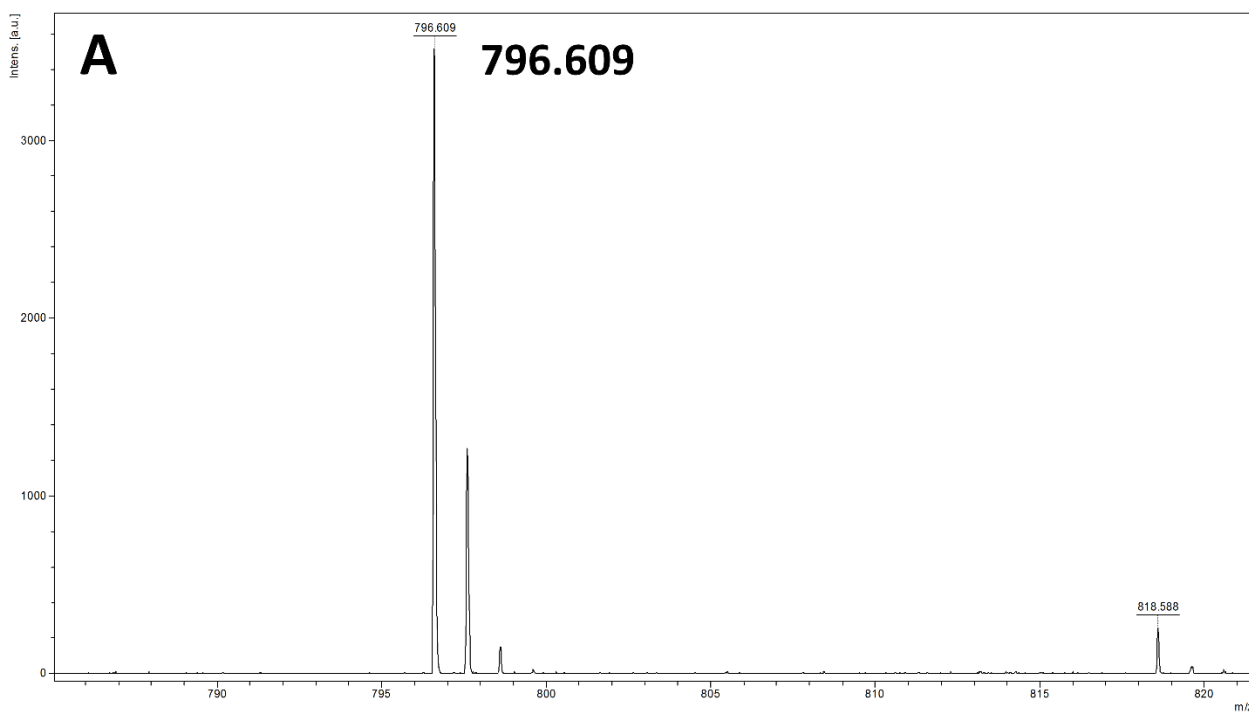

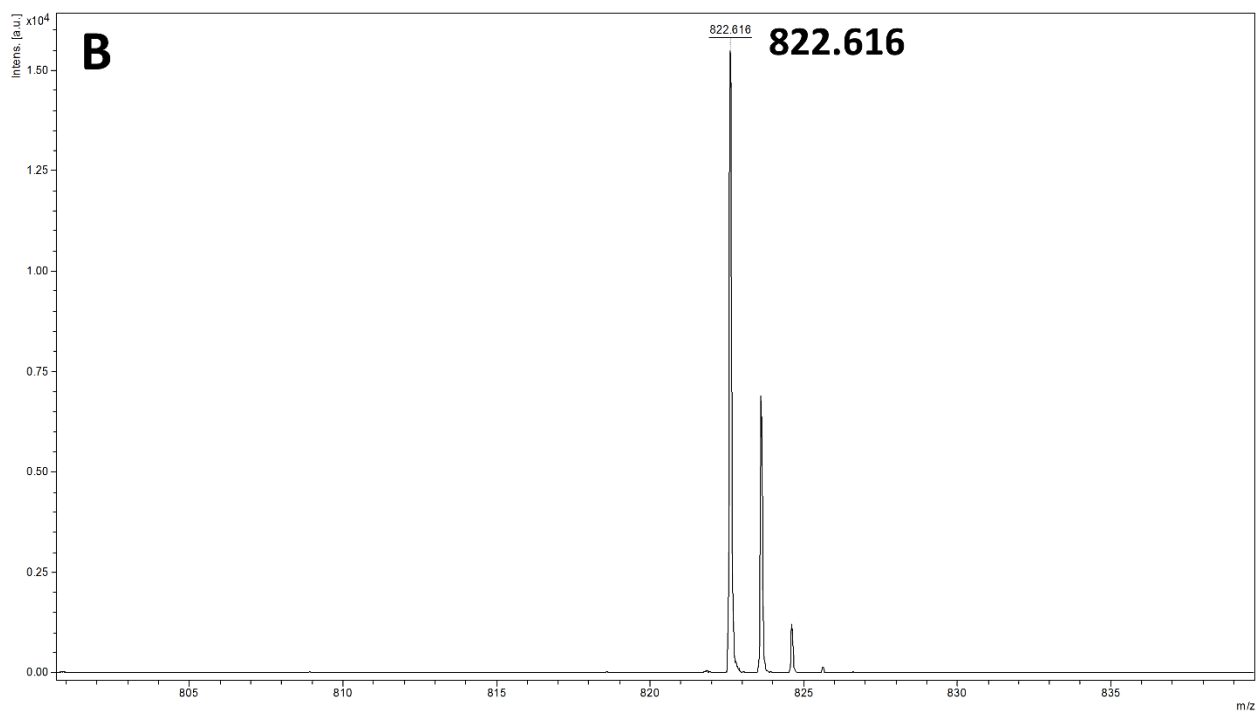

**Figure S1.** HR-MS for Cyclic peptide A) Cyclo(KLARLLT) and B) Cyclo(KN3)larllt).



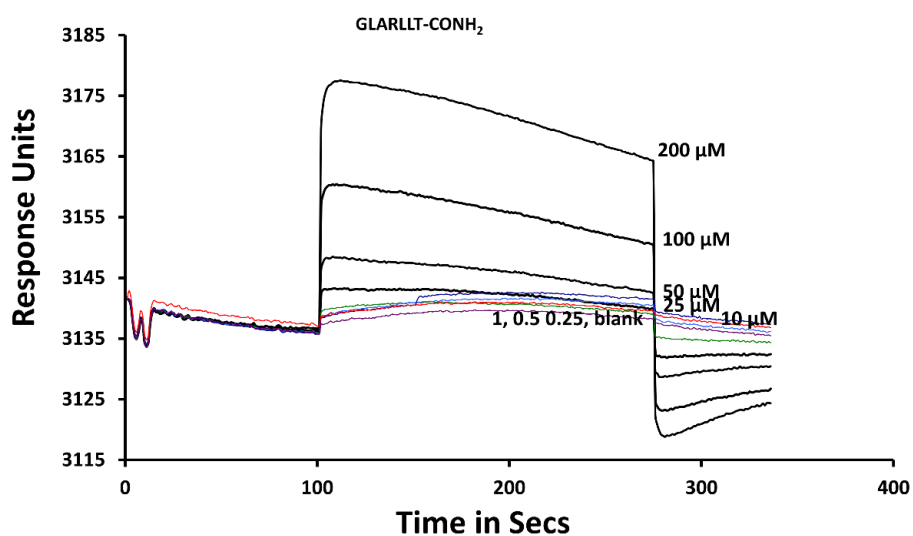

**Figure S2.** SPR analysis of linear peptide GLARLLT. EGFR was immobilized on CM5 sensor chip and different concentrations of peptide was injected to obtain the SPR response. Binding of peptide GLARLLT to EGFR was observed with increasing concentration of the peptide.

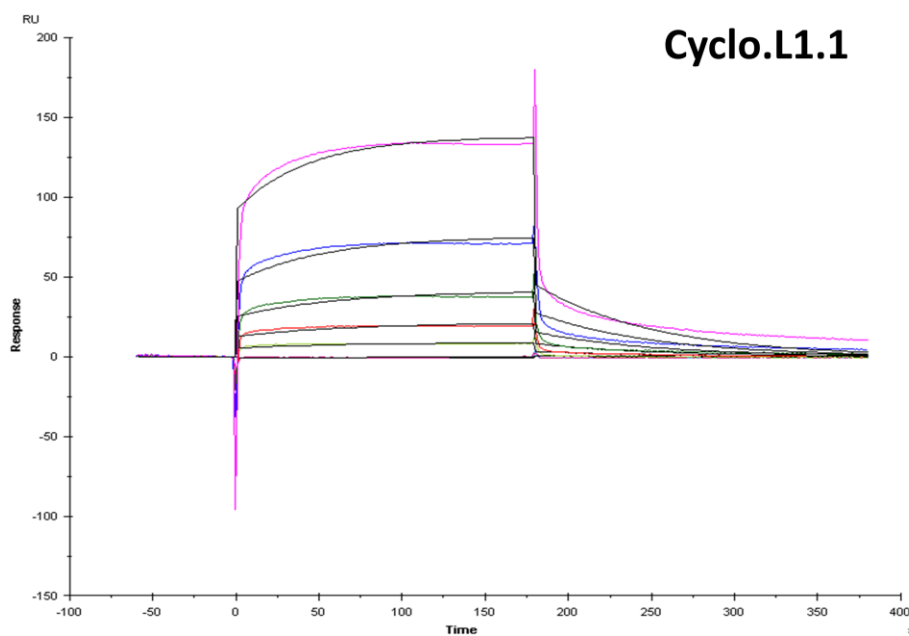

**Figure S3.** Curvefitting of SPR sensorgram for **Cyclo.L1.1** using 1:1 Langmuir interaction describing the single exponential of the data. Black lines are experimental data and different colored lines represent fitted lines.  $K_D$  values reported were from  $k_{on}$  and  $k_{off}$  calculations.

## L1.7

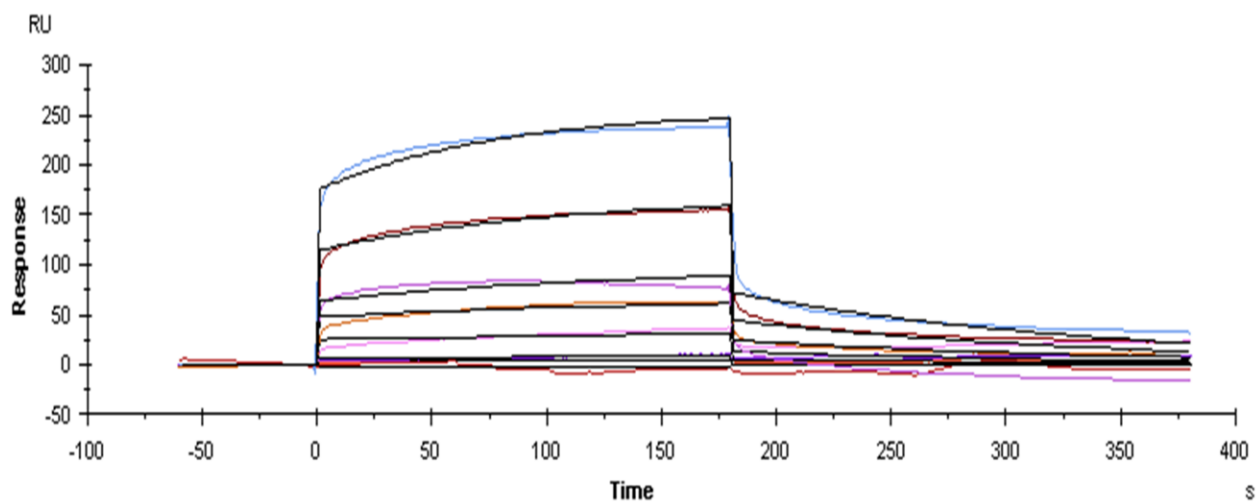

**Figure S4.** Curvefitting of SPR sensorgram for **L1.7** using 1:1 Langmuir interaction describing the single exponential of the data. Black lines are experimental data and different colored lines represent fitted lines.

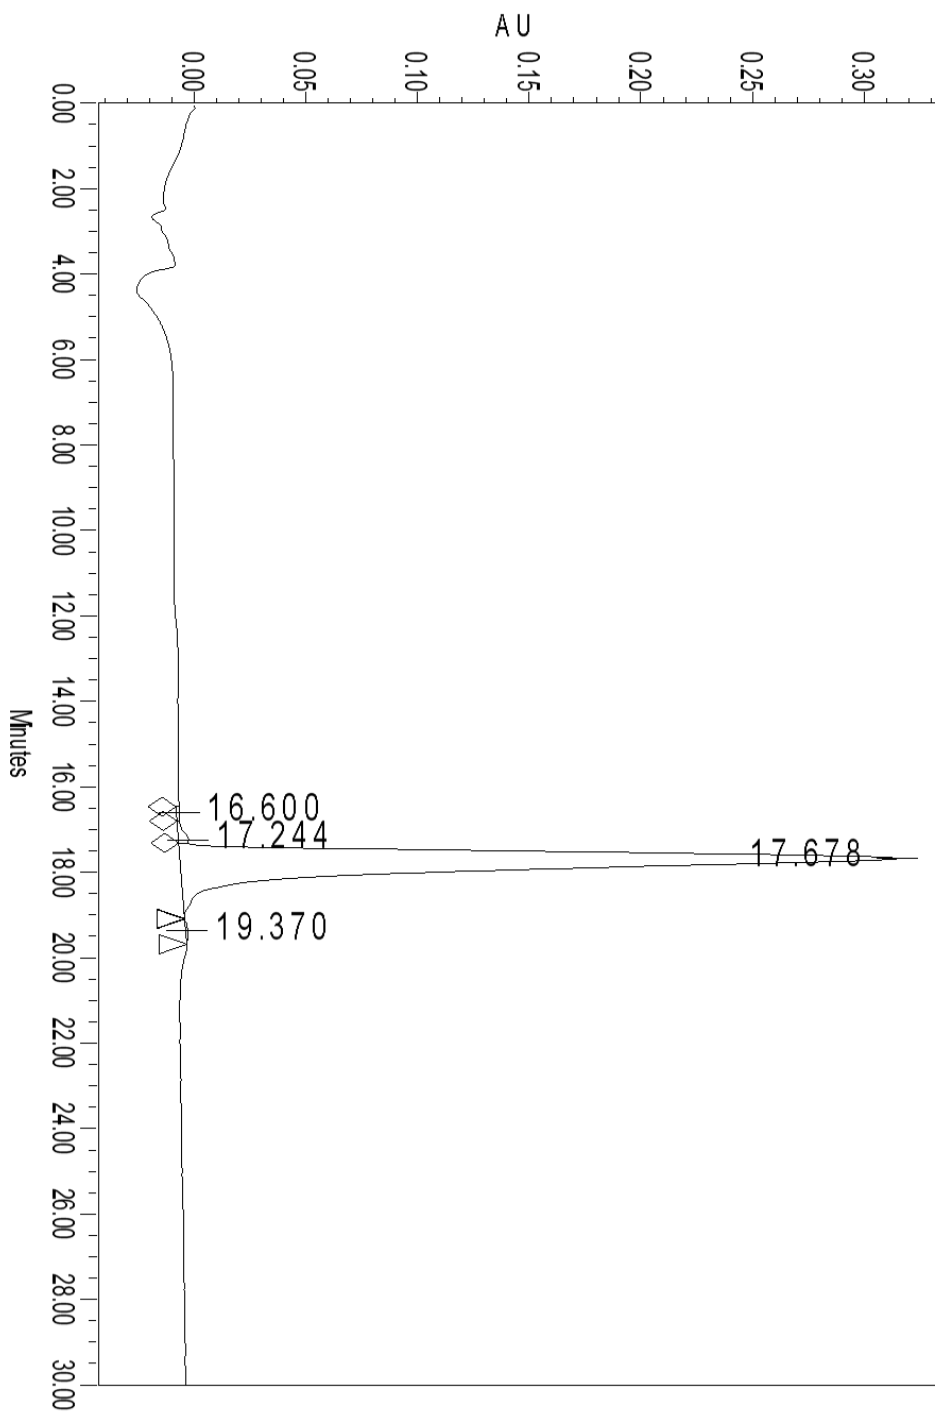

**Figure S5:** HPLC for peptide L1.

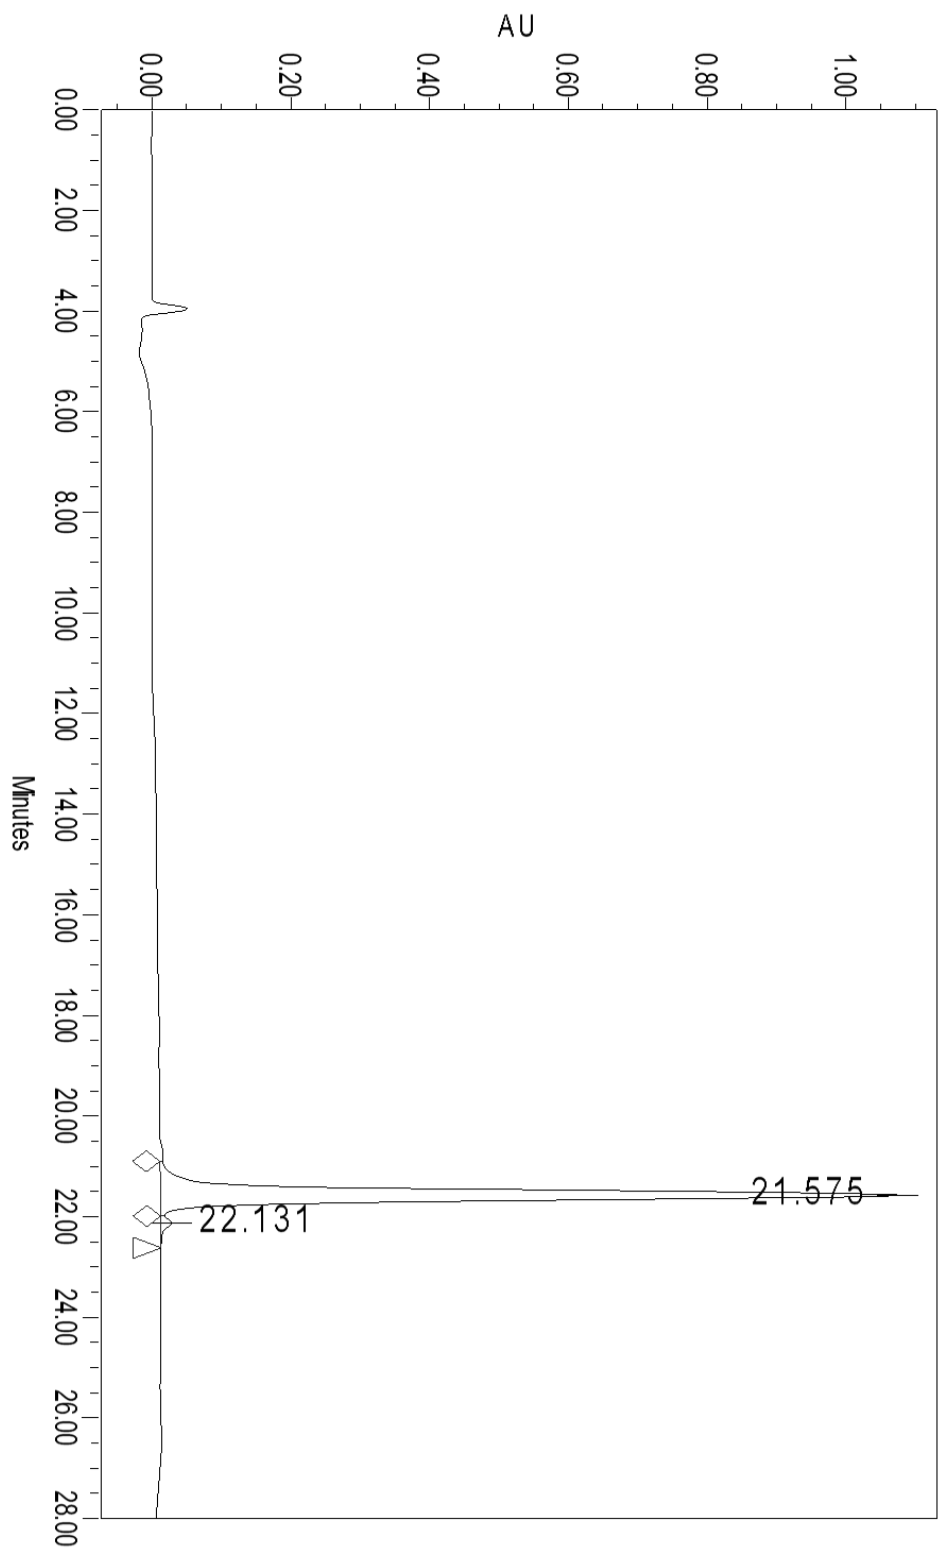

**Figure S6.** HPLC of peptide **L1.3**.

**Auto-Scaled Chromatogram**

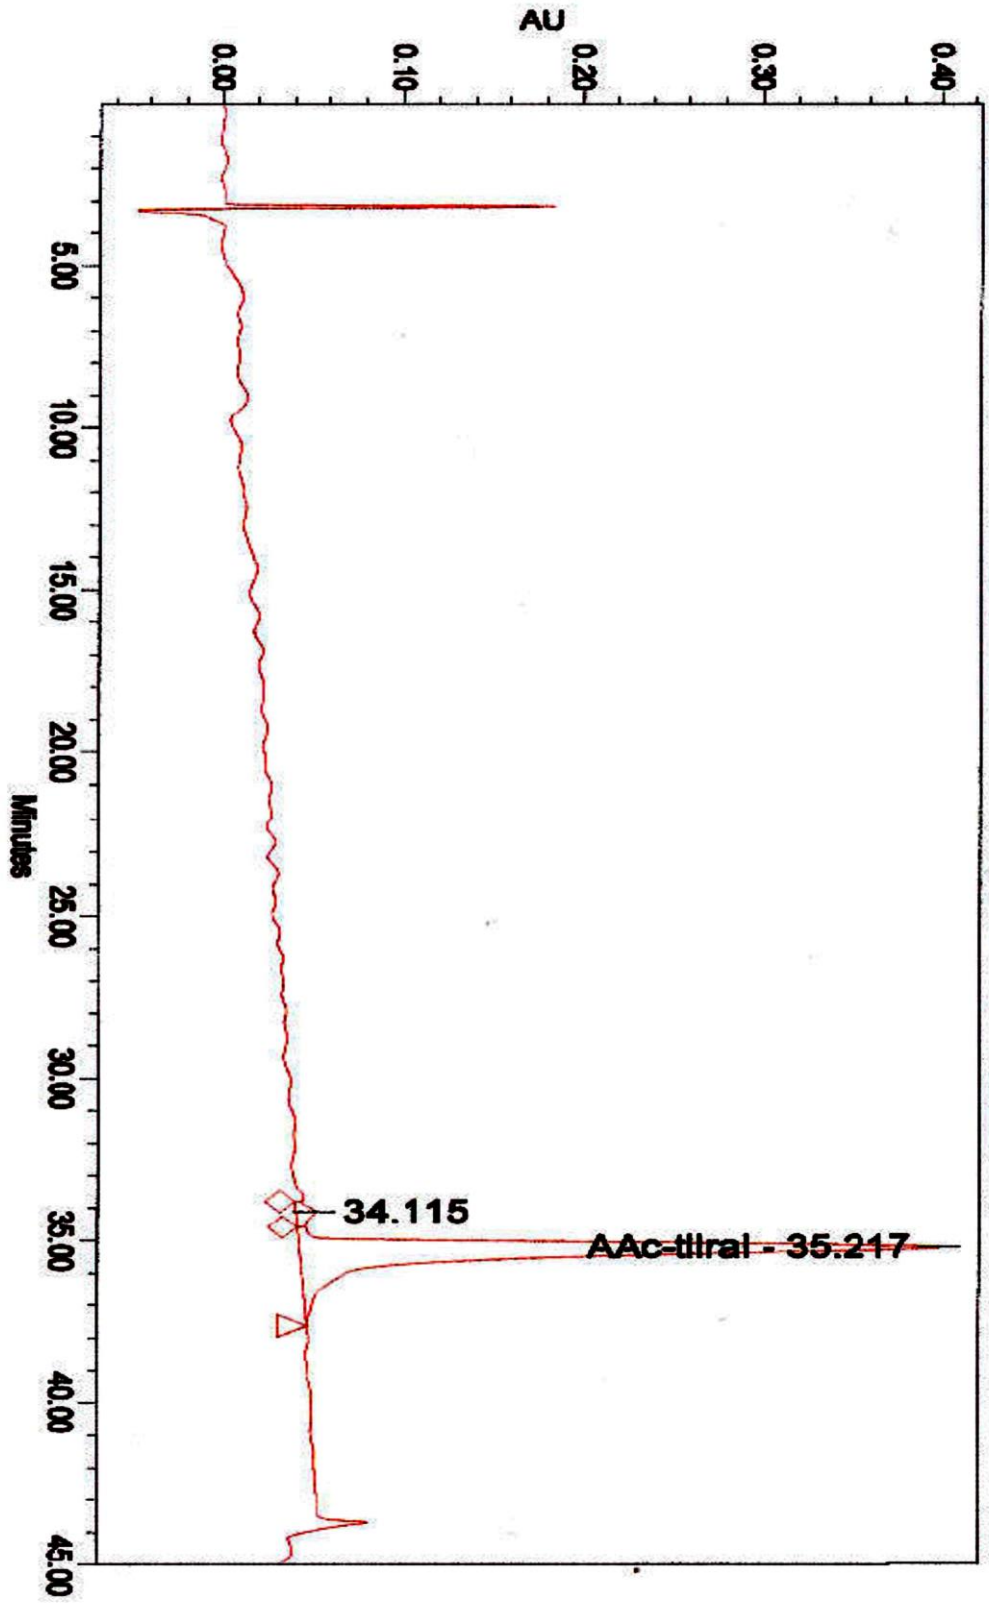

Figure S7. HPLC for peptide L1.4.

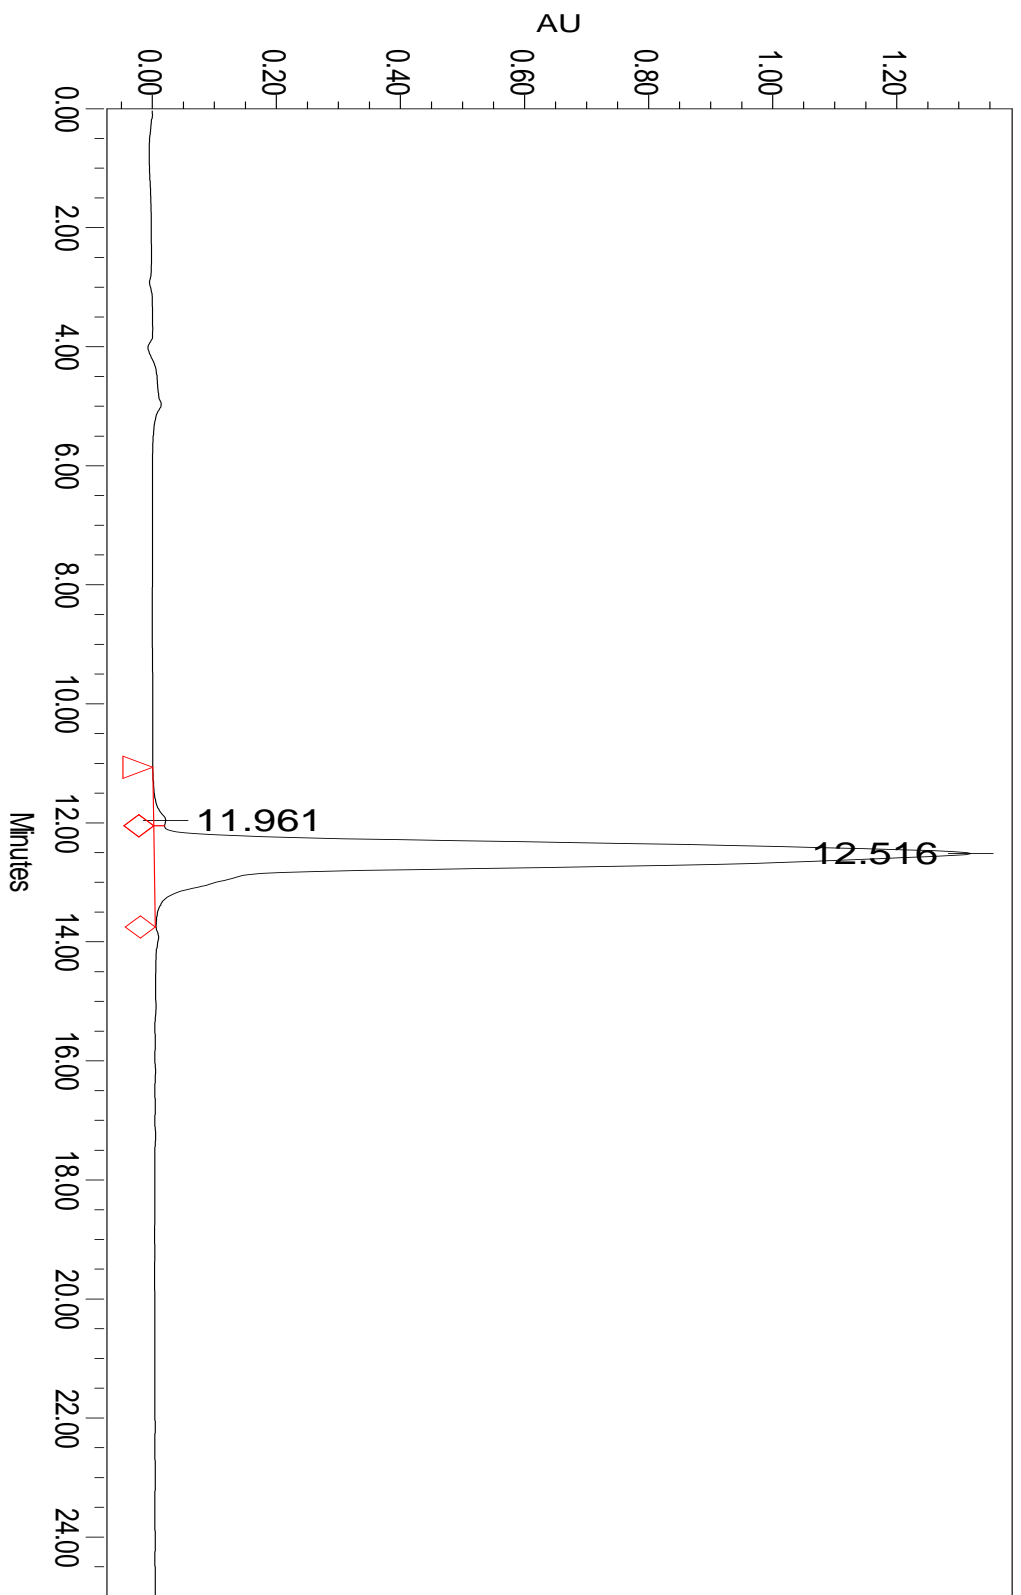

**Figure S8.** HPLC for peptide **L1.5**.

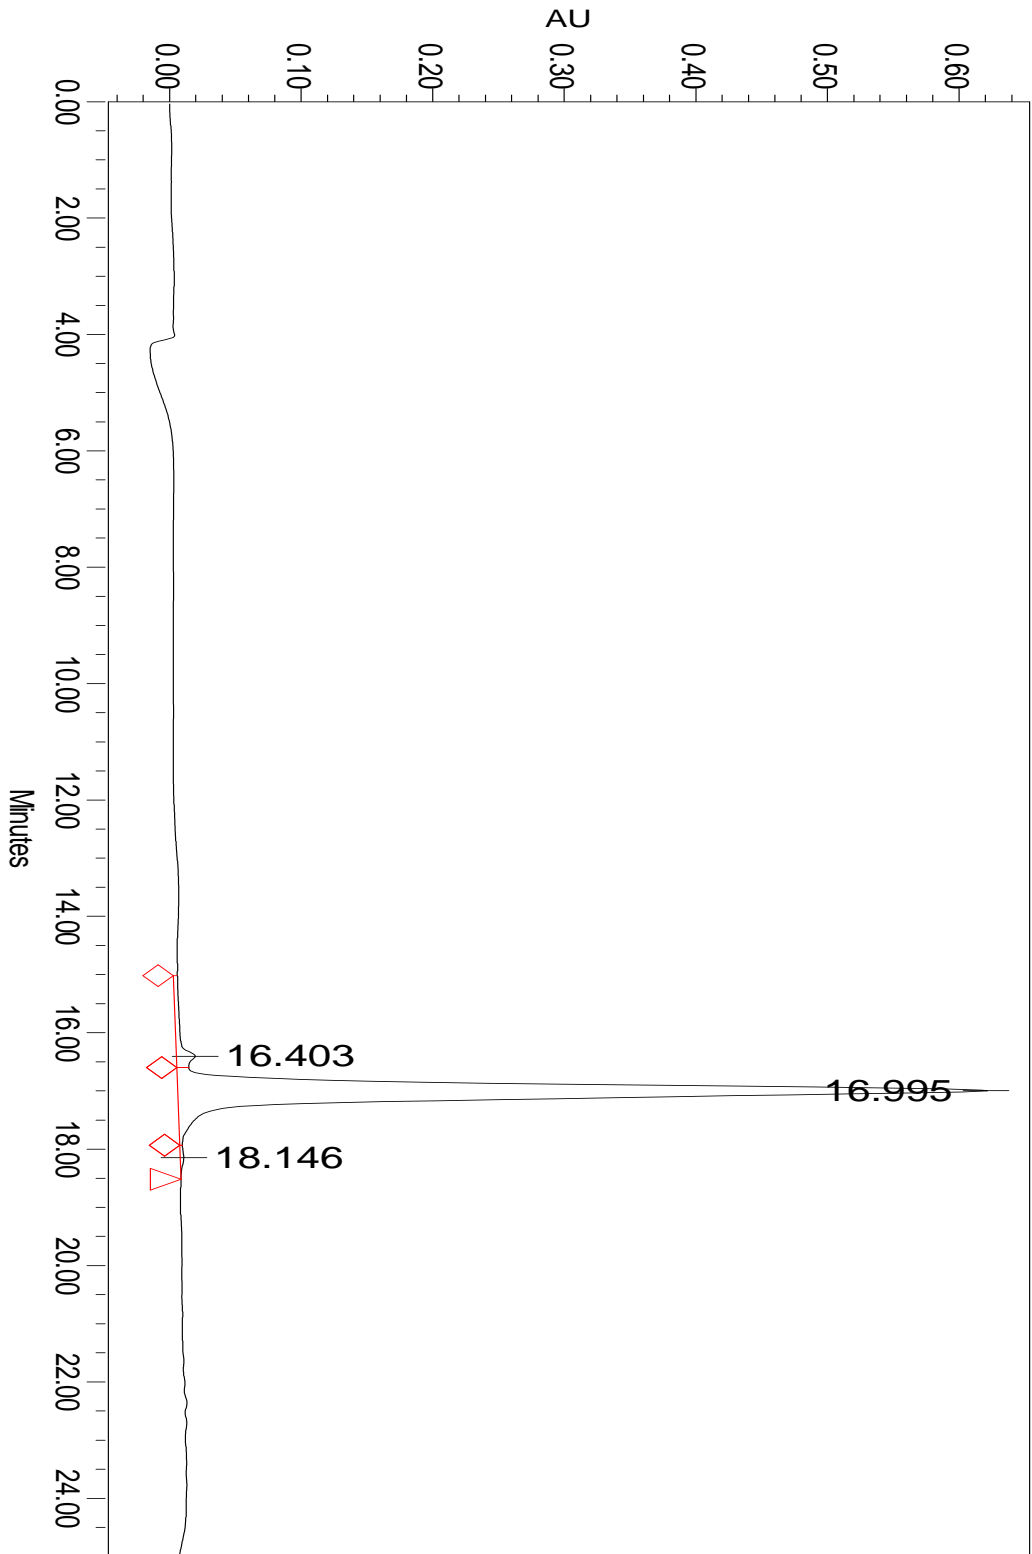

**Figure S9.** HPLC for peptide L1.6.

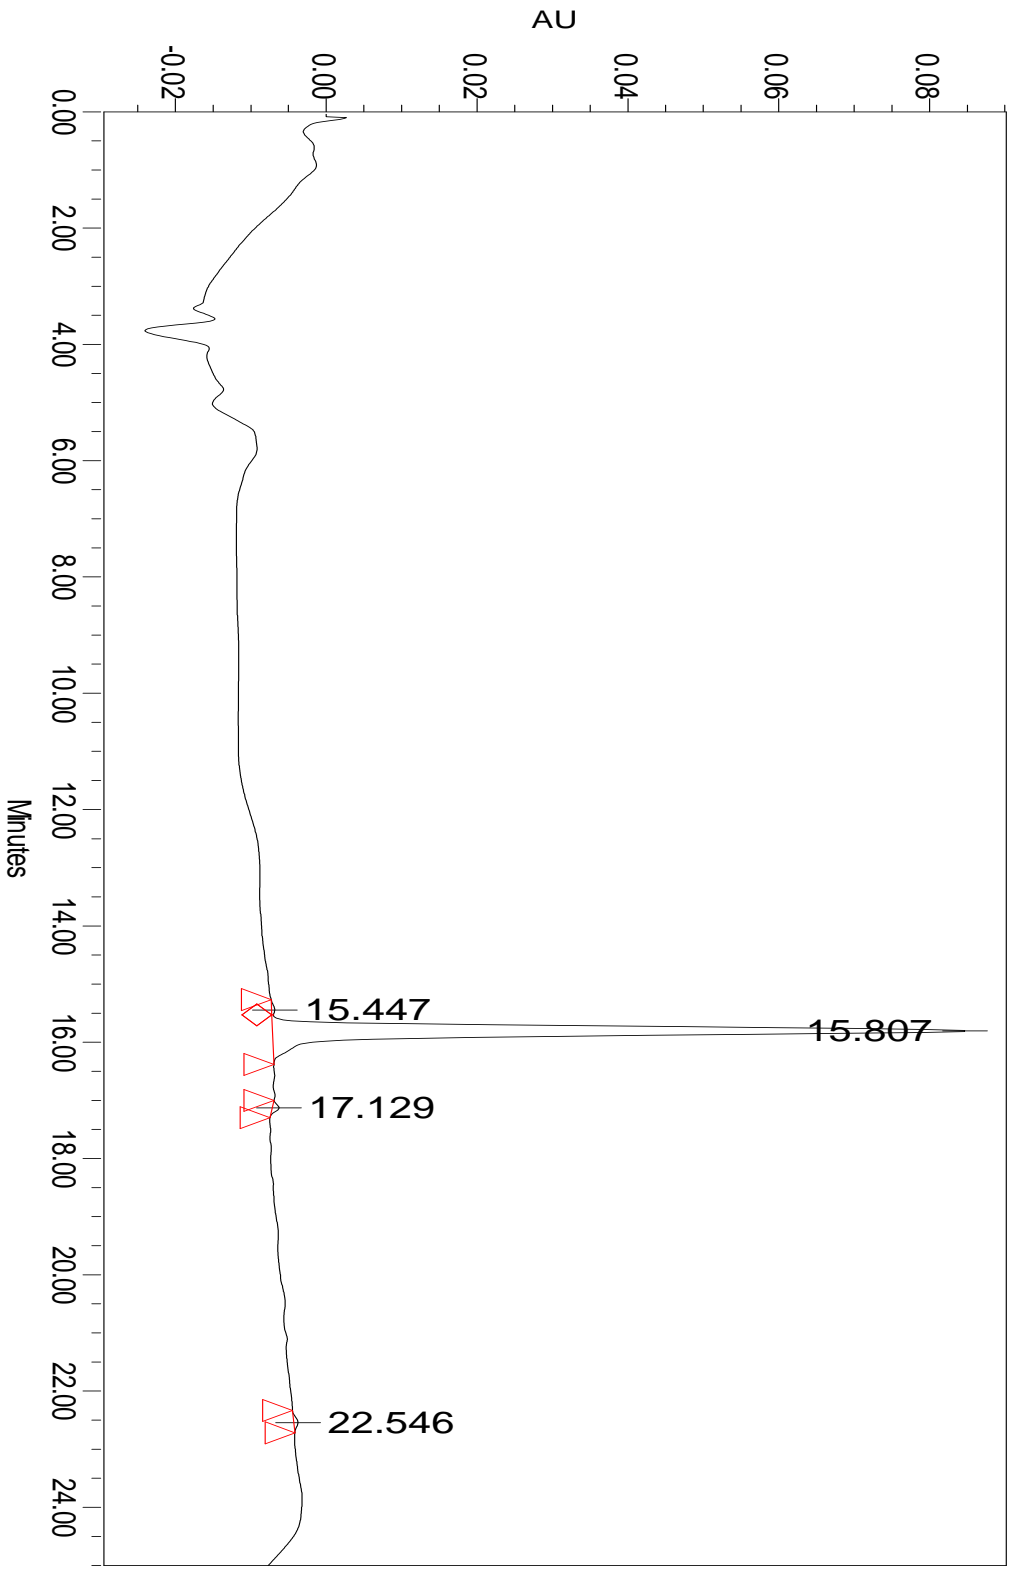

**Figure S10.** HPLC for peptide L1.7.



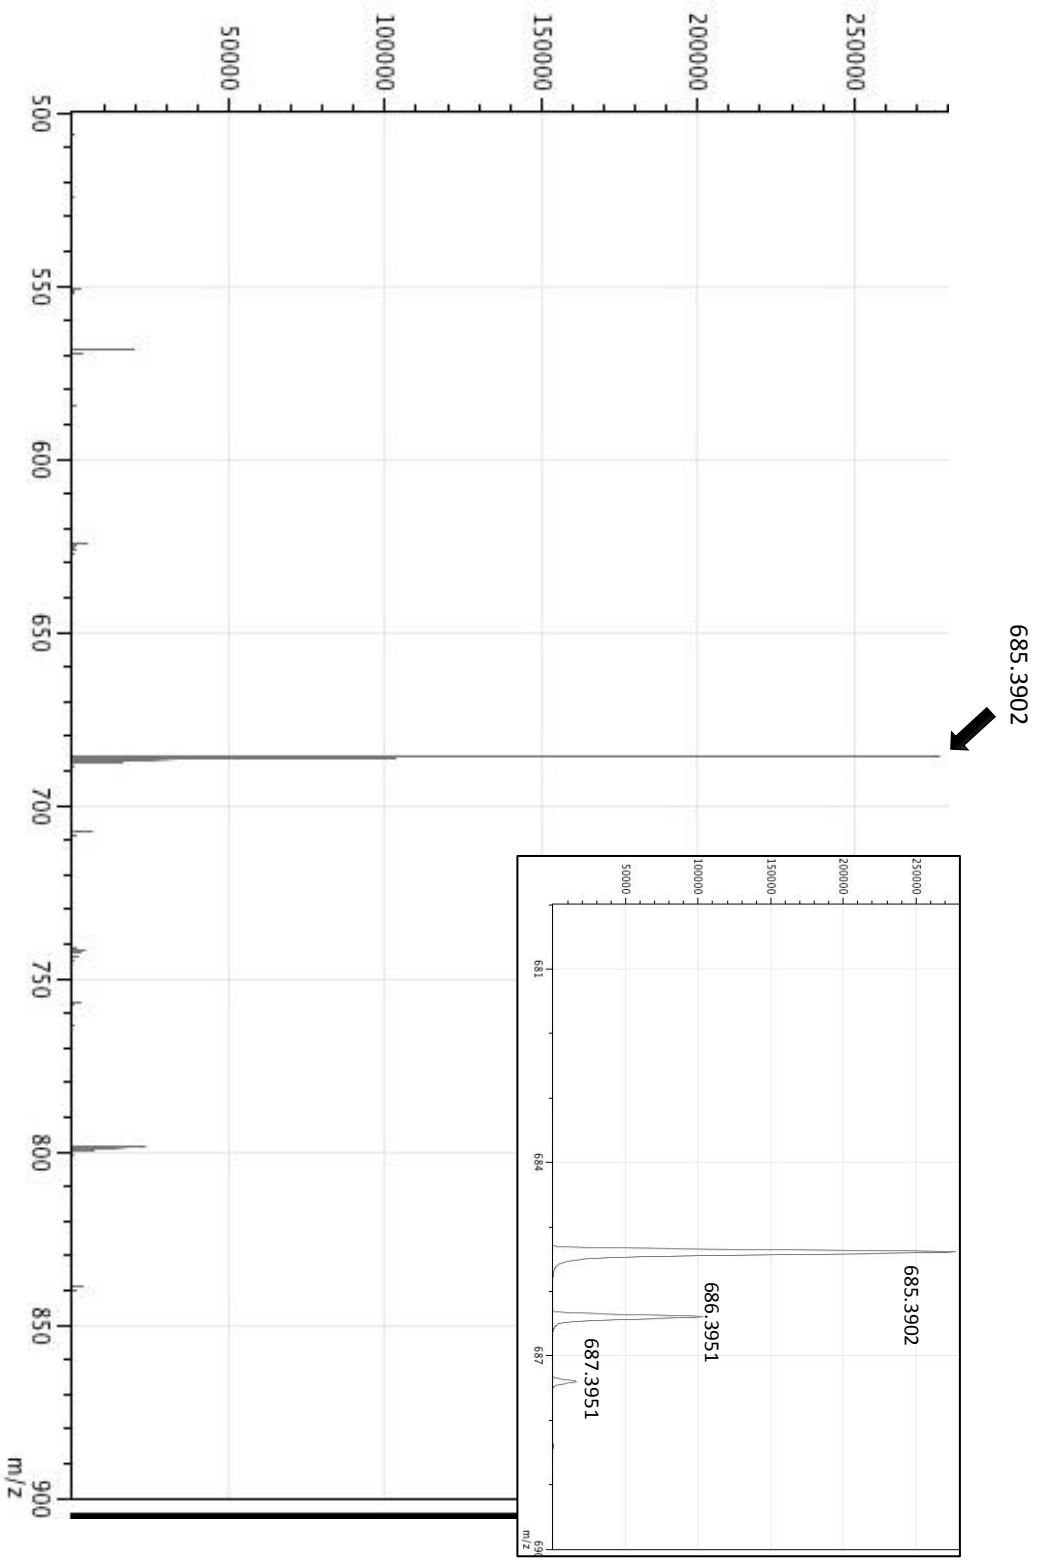

**Figure S11.** HPLC for peptide L1

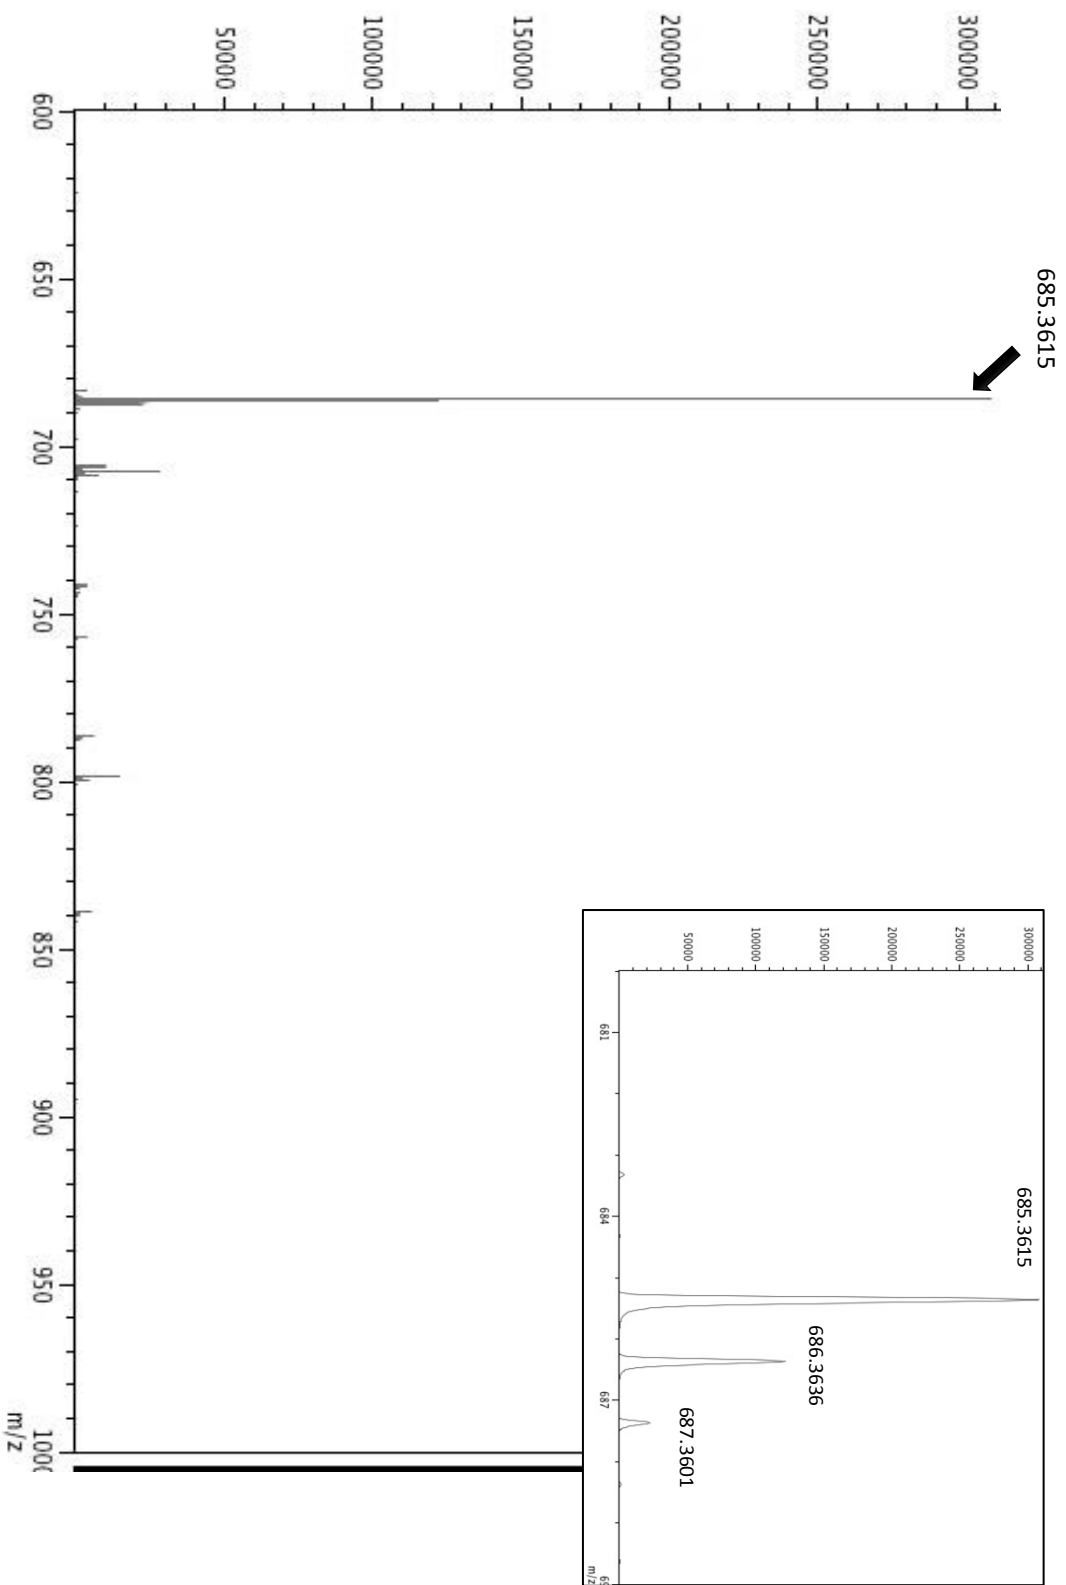

Figure S12. MALDI-TOF of peptide L1.3

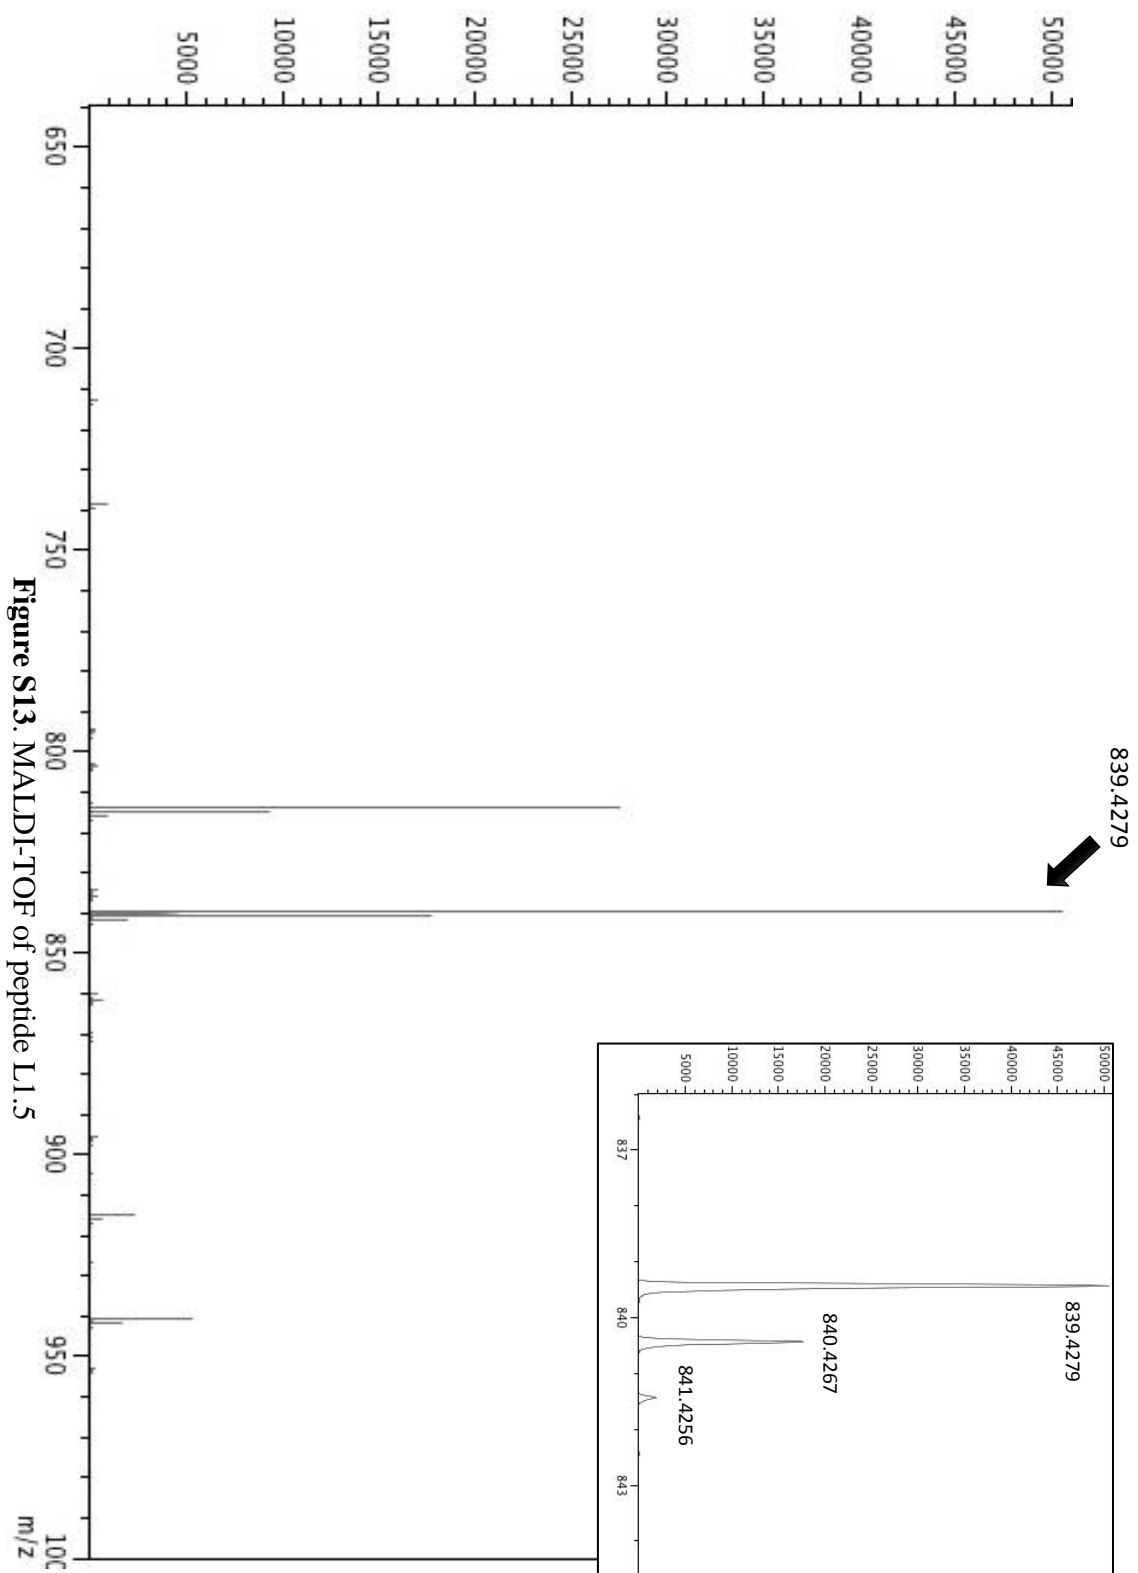

Figure S13. MALDI-TOF of peptide L1.5

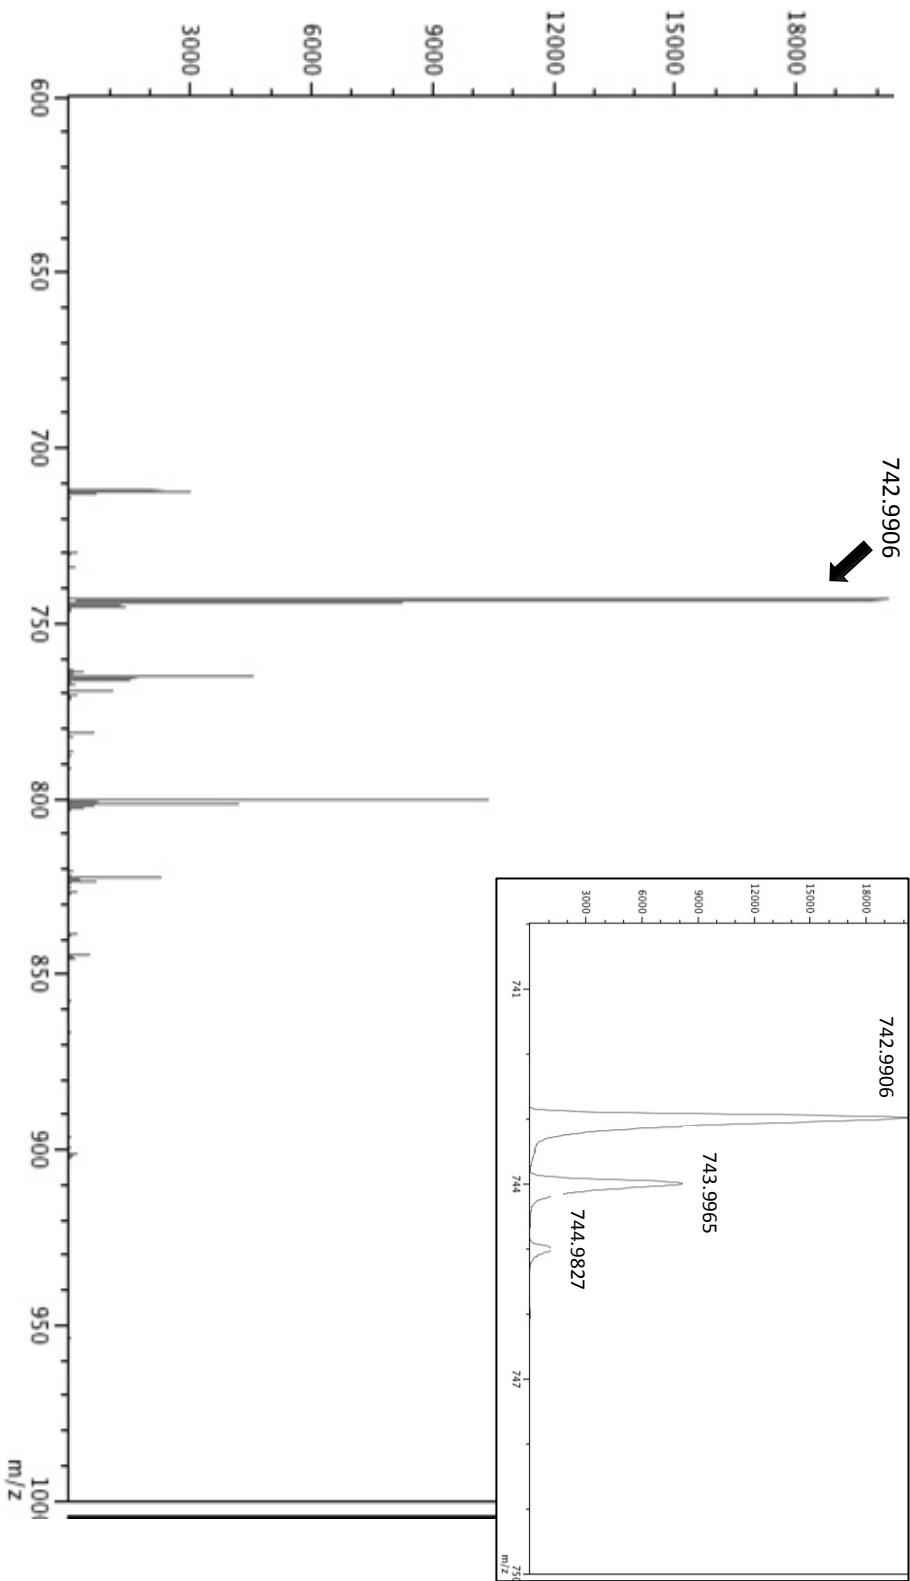

Figure S14. MALDI-TOF of peptide L1.6

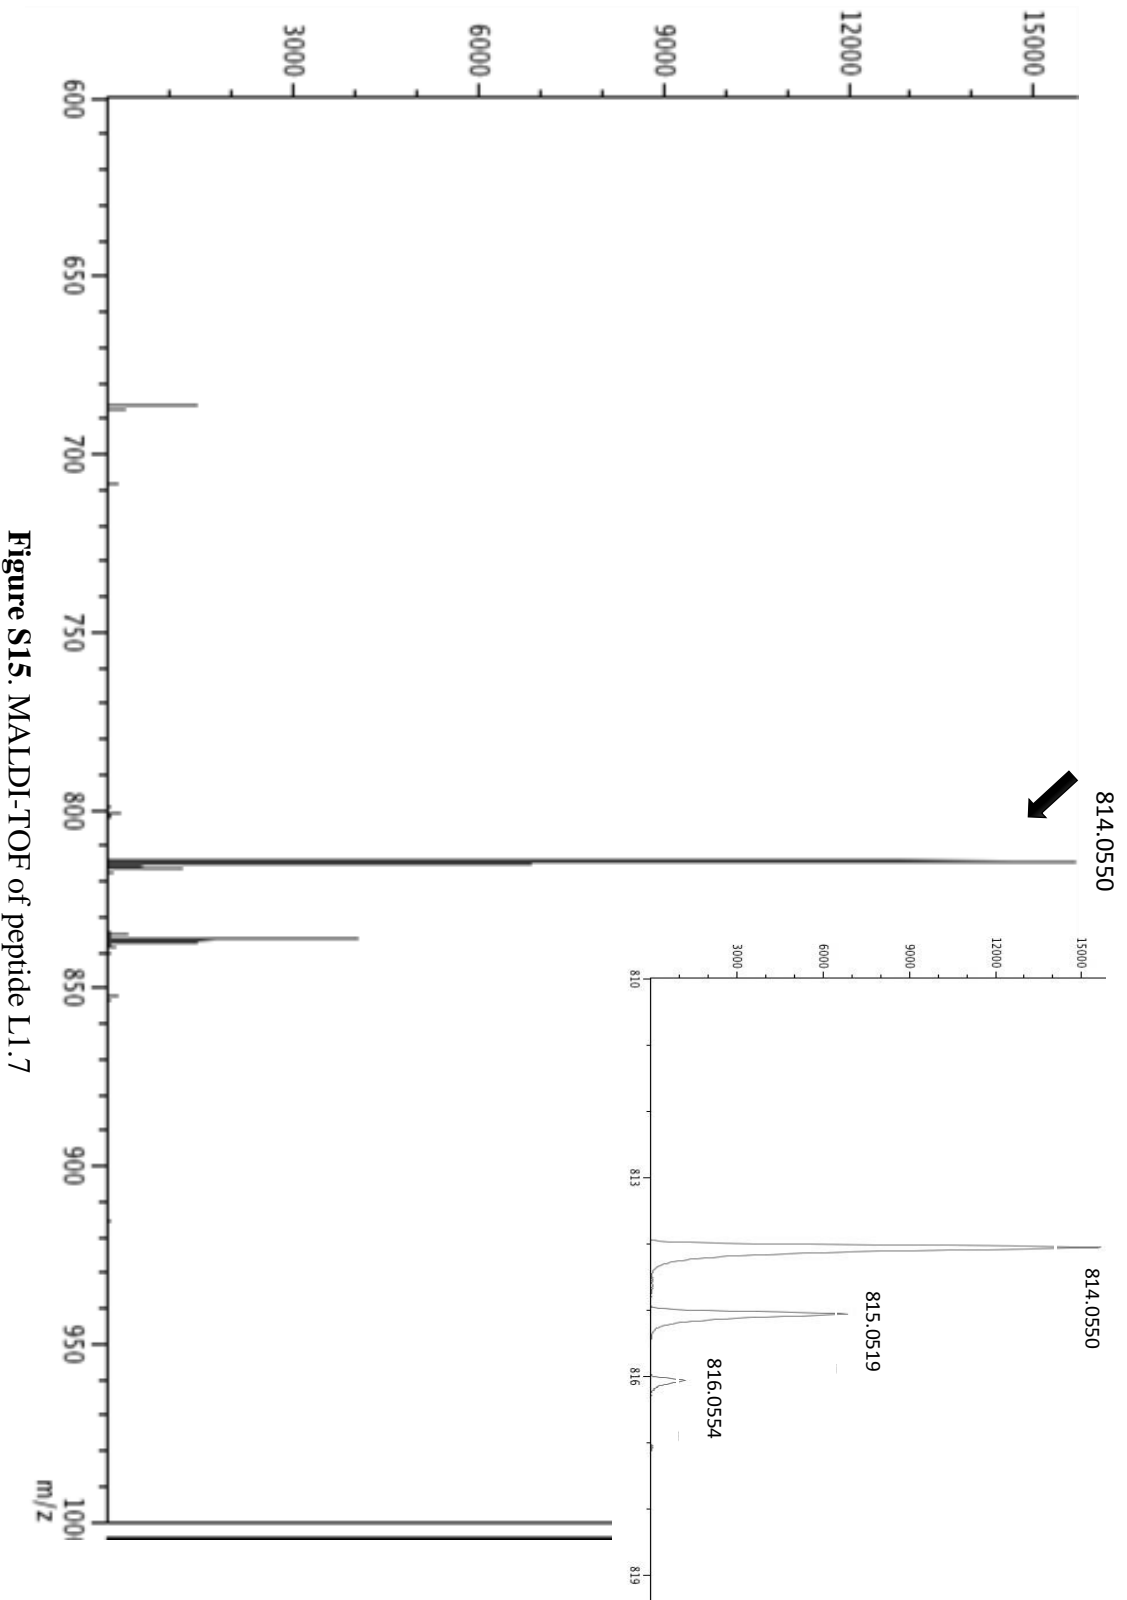

Figure S15. MALDI-TOF of peptide L1.7

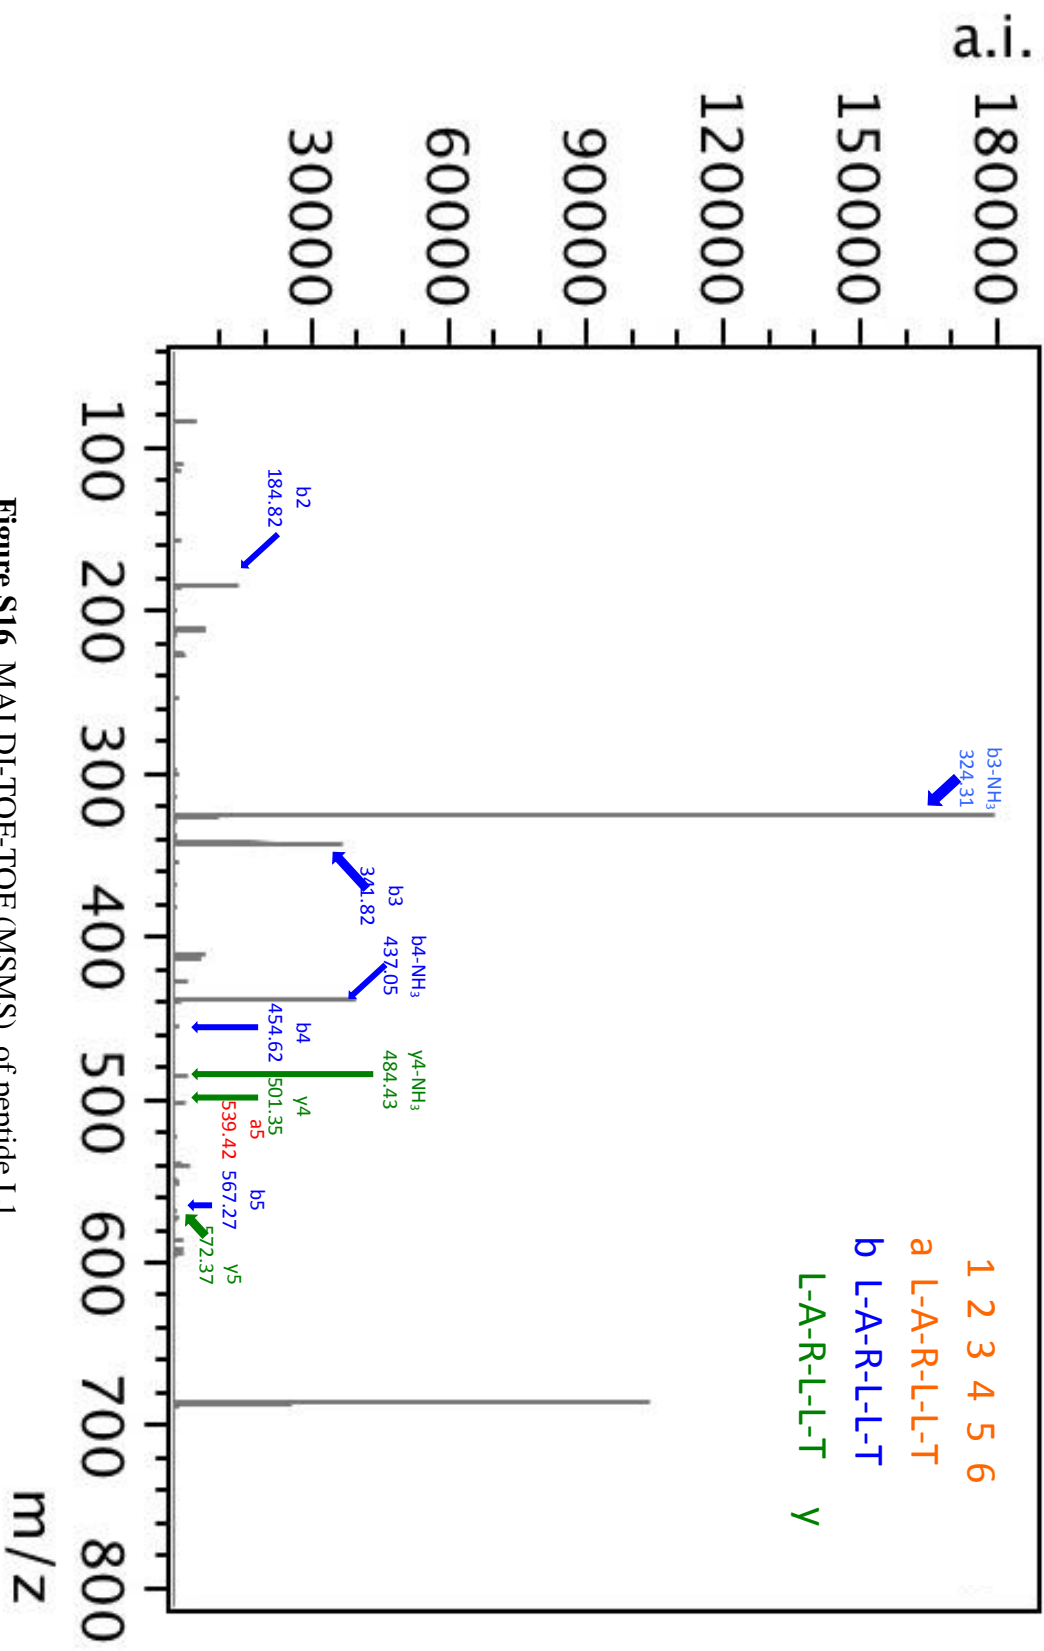

Figure S16. MALDI-TOF-TOF (MSMS) of peptide L1

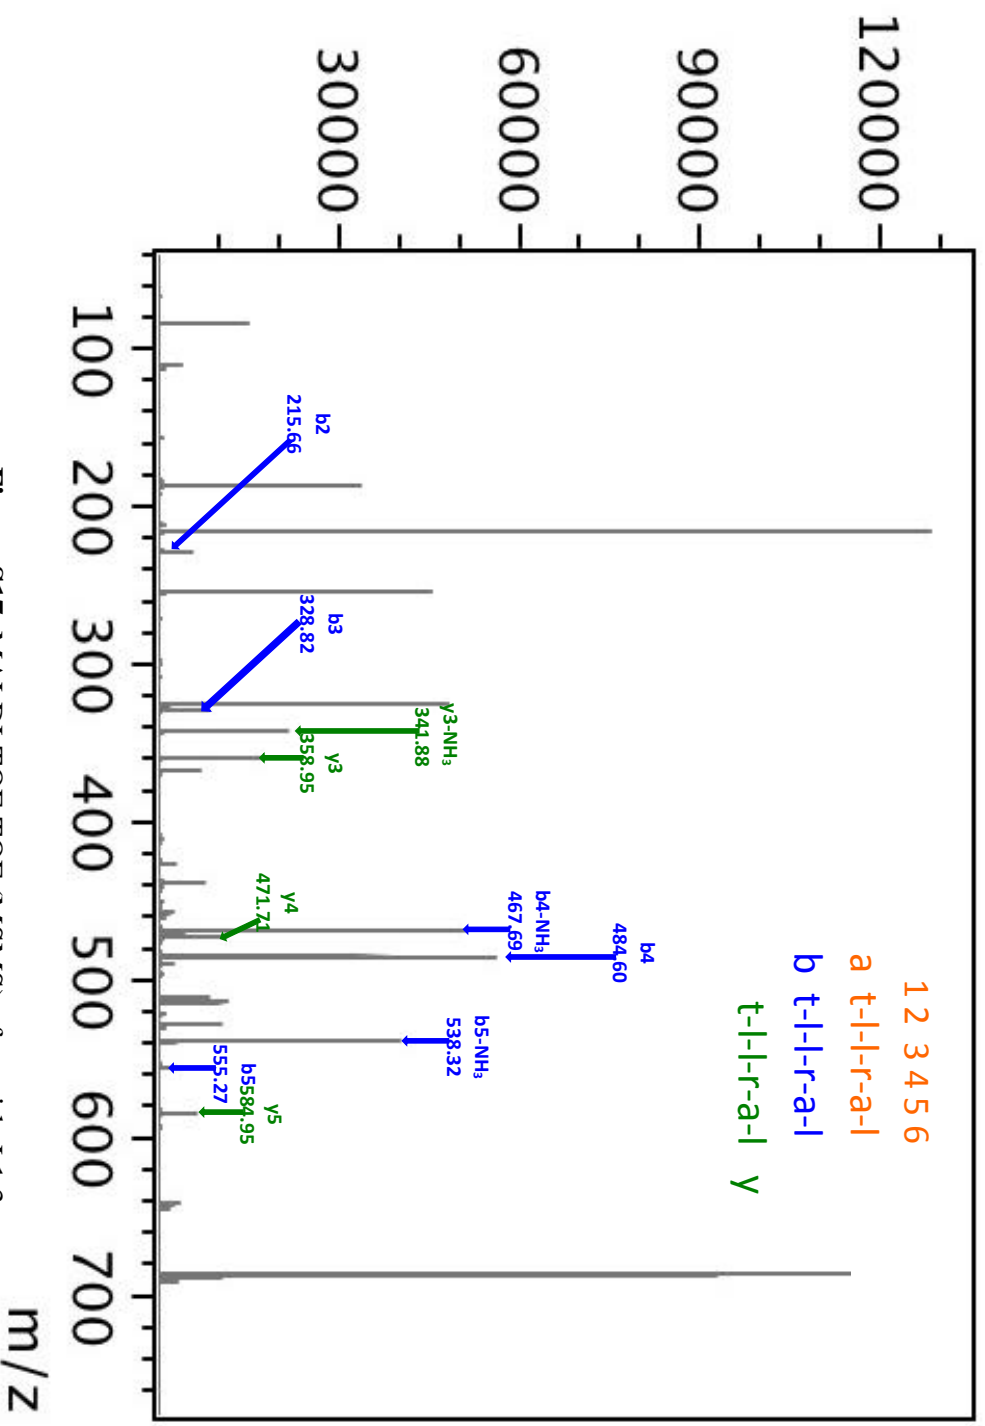

Figure S17. MALDI-TOF-TOF (MS/MS) of peptide L1.3

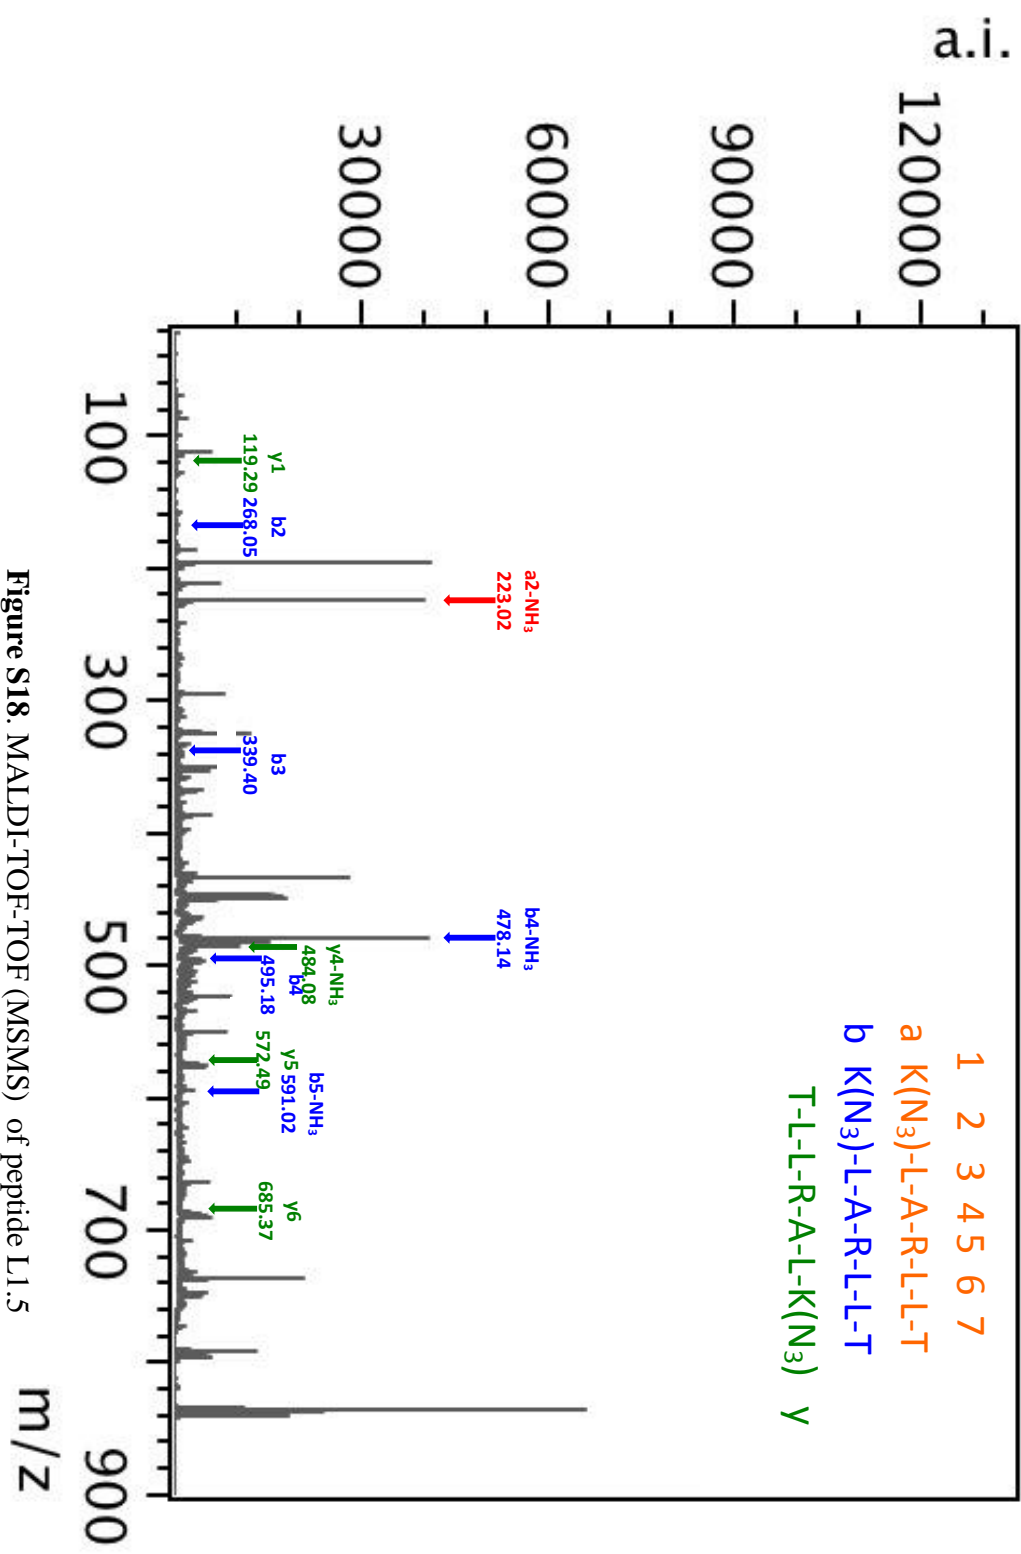

Figure S18. MALDI-TOF-TOF (MS/MS) of peptide L1.5



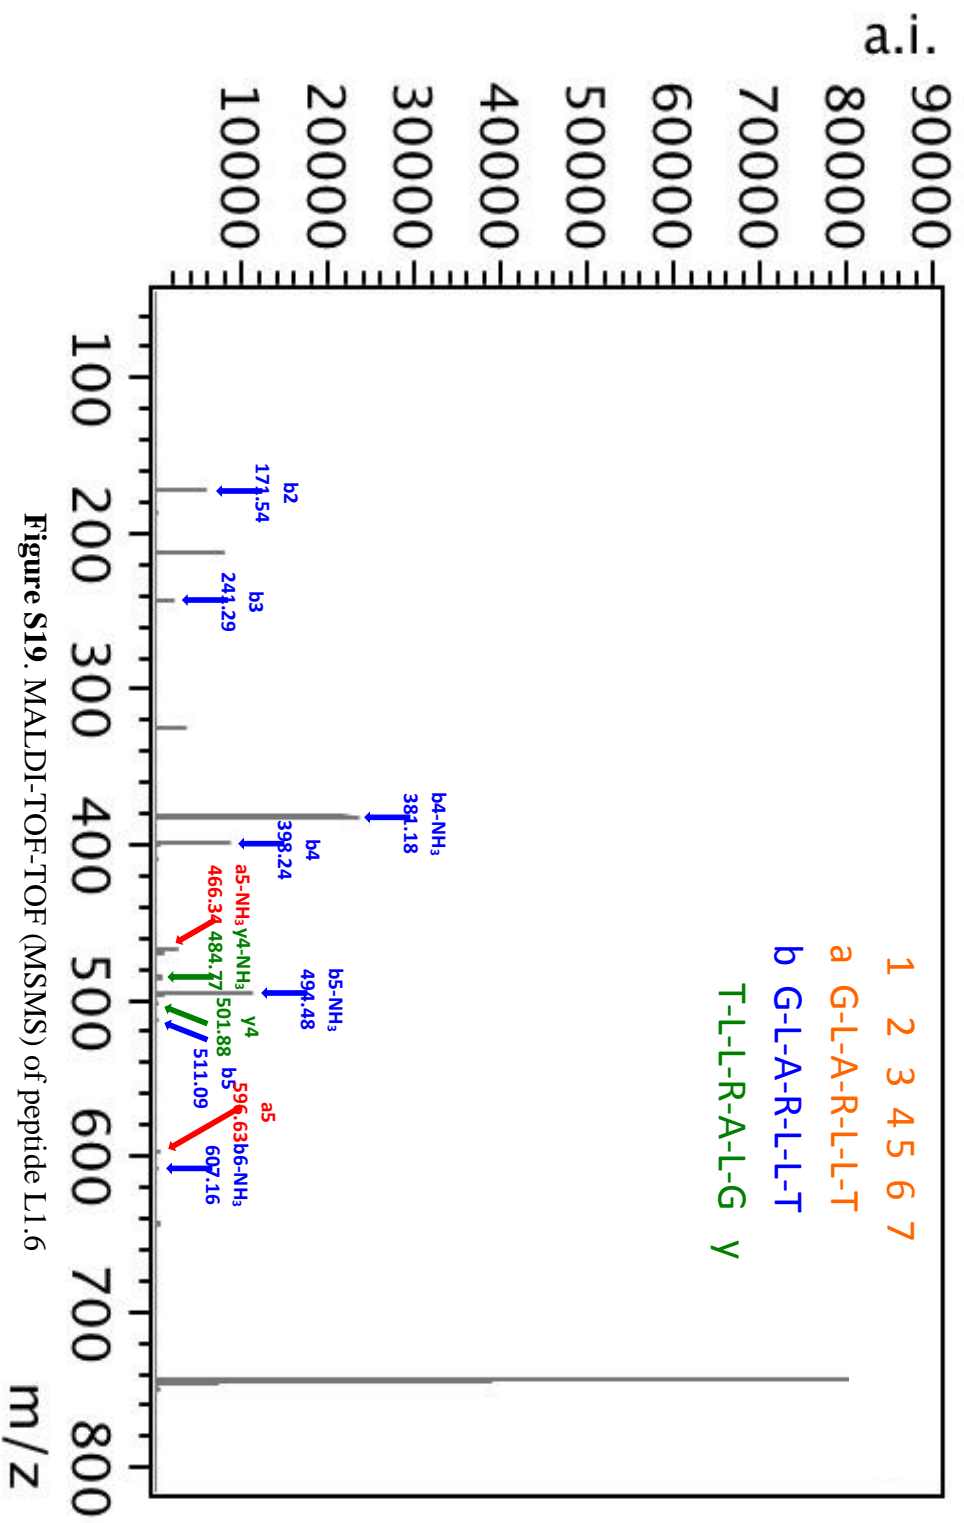

Figure S19. MALDI-TOF-TOF (MS/MS) of peptide L1.6

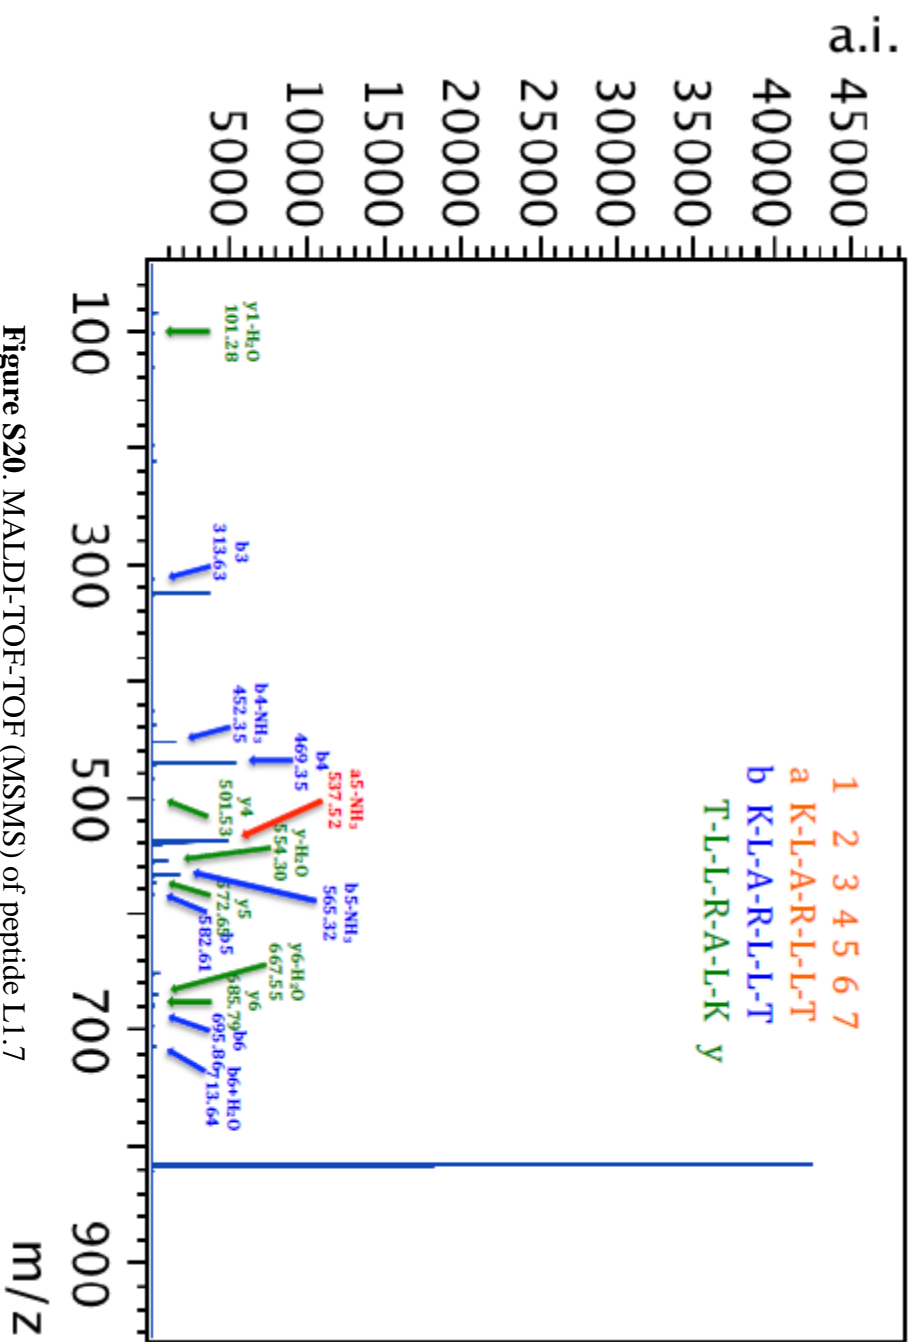

Figure S20. MALDI-TOF-TOF (MSMS) of peptide L1.7

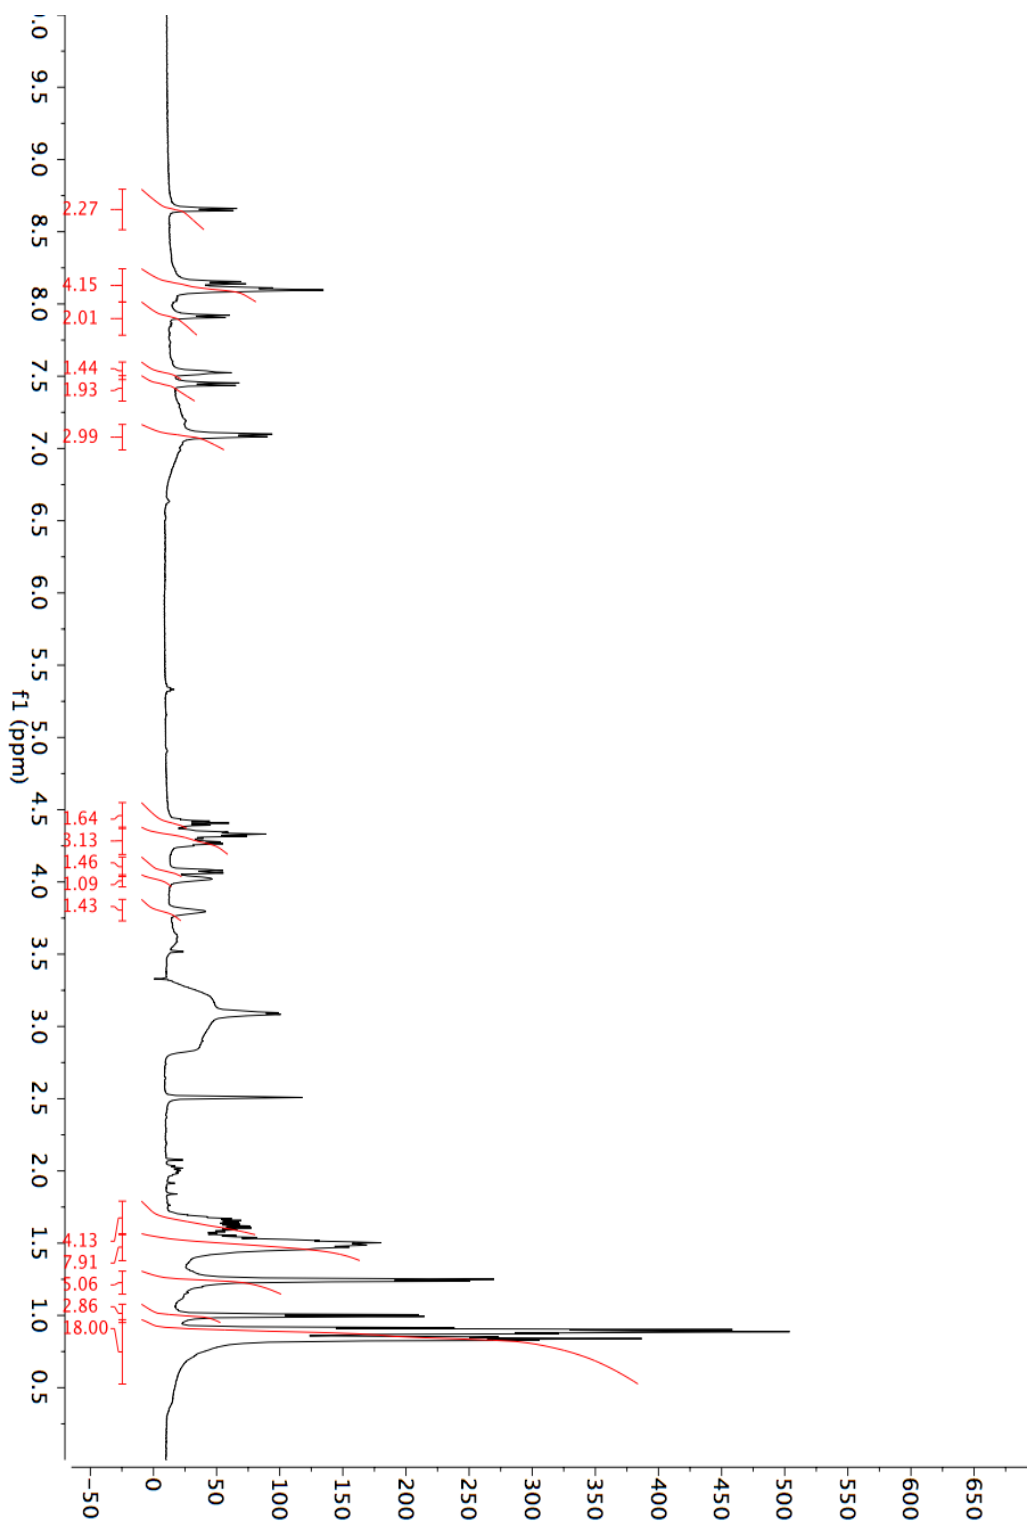

Figure S21. <sup>1</sup>H NMR spectrum for peptide L1.

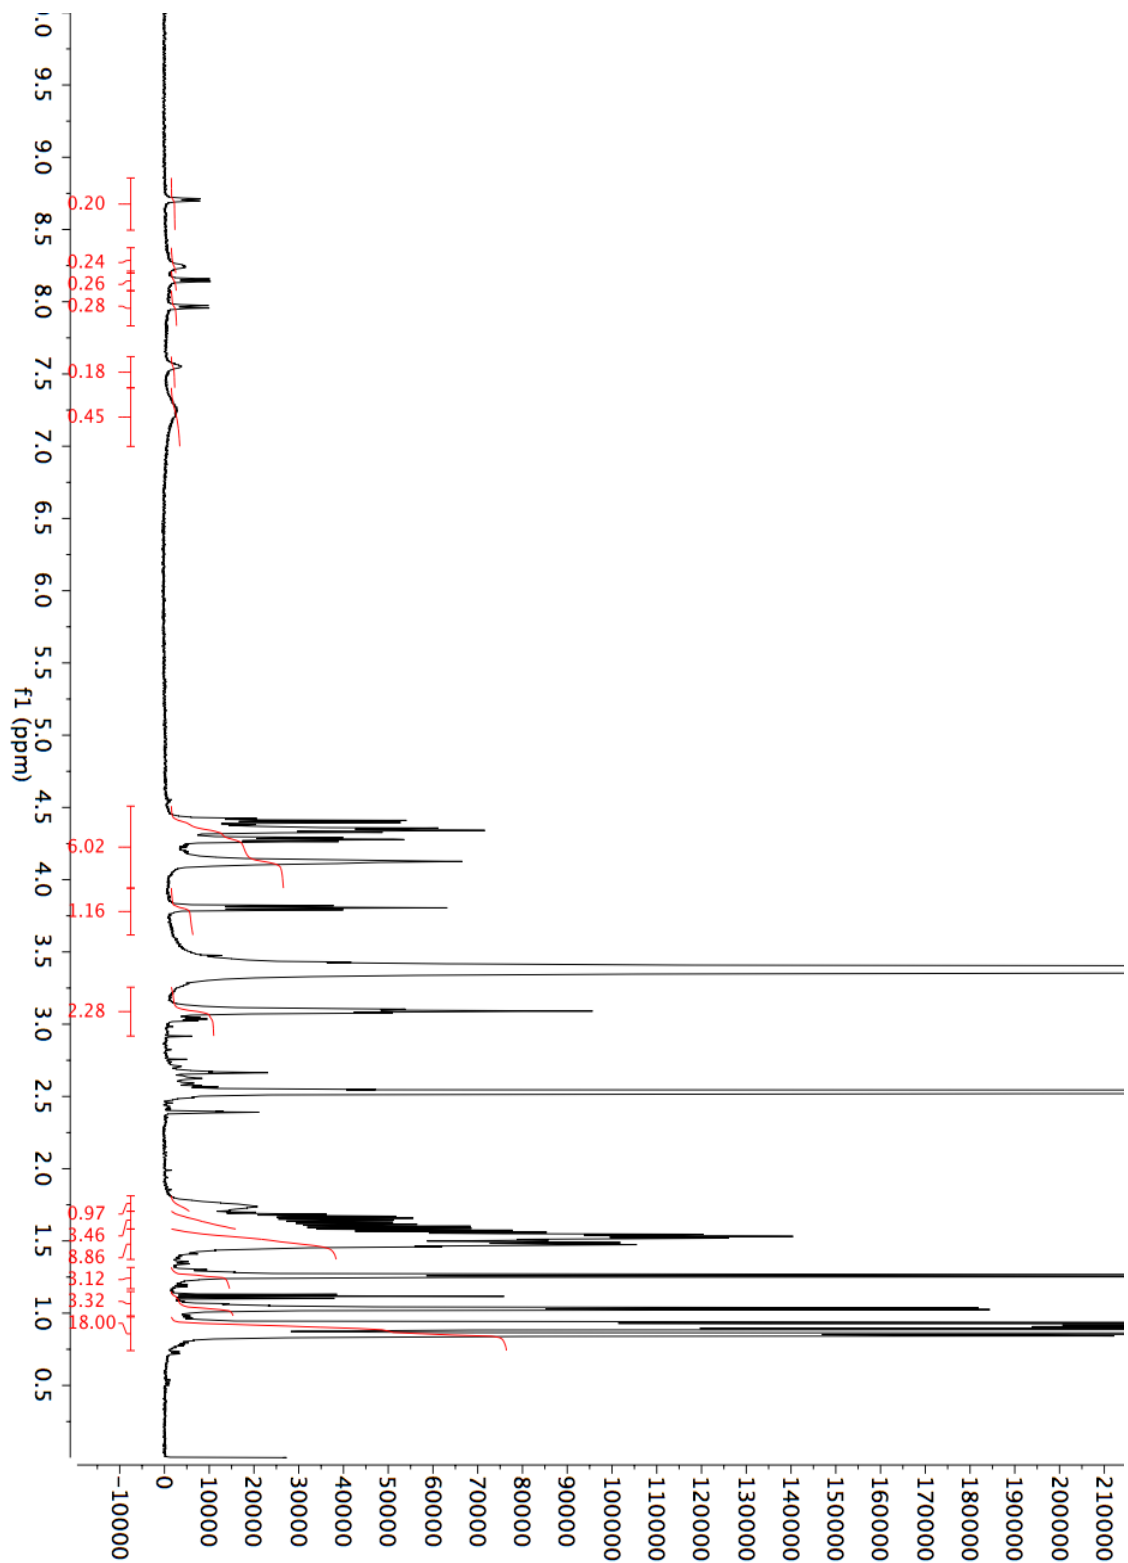

**Figure S22.** <sup>1</sup>H NMR spectrum for peptide L1.1.

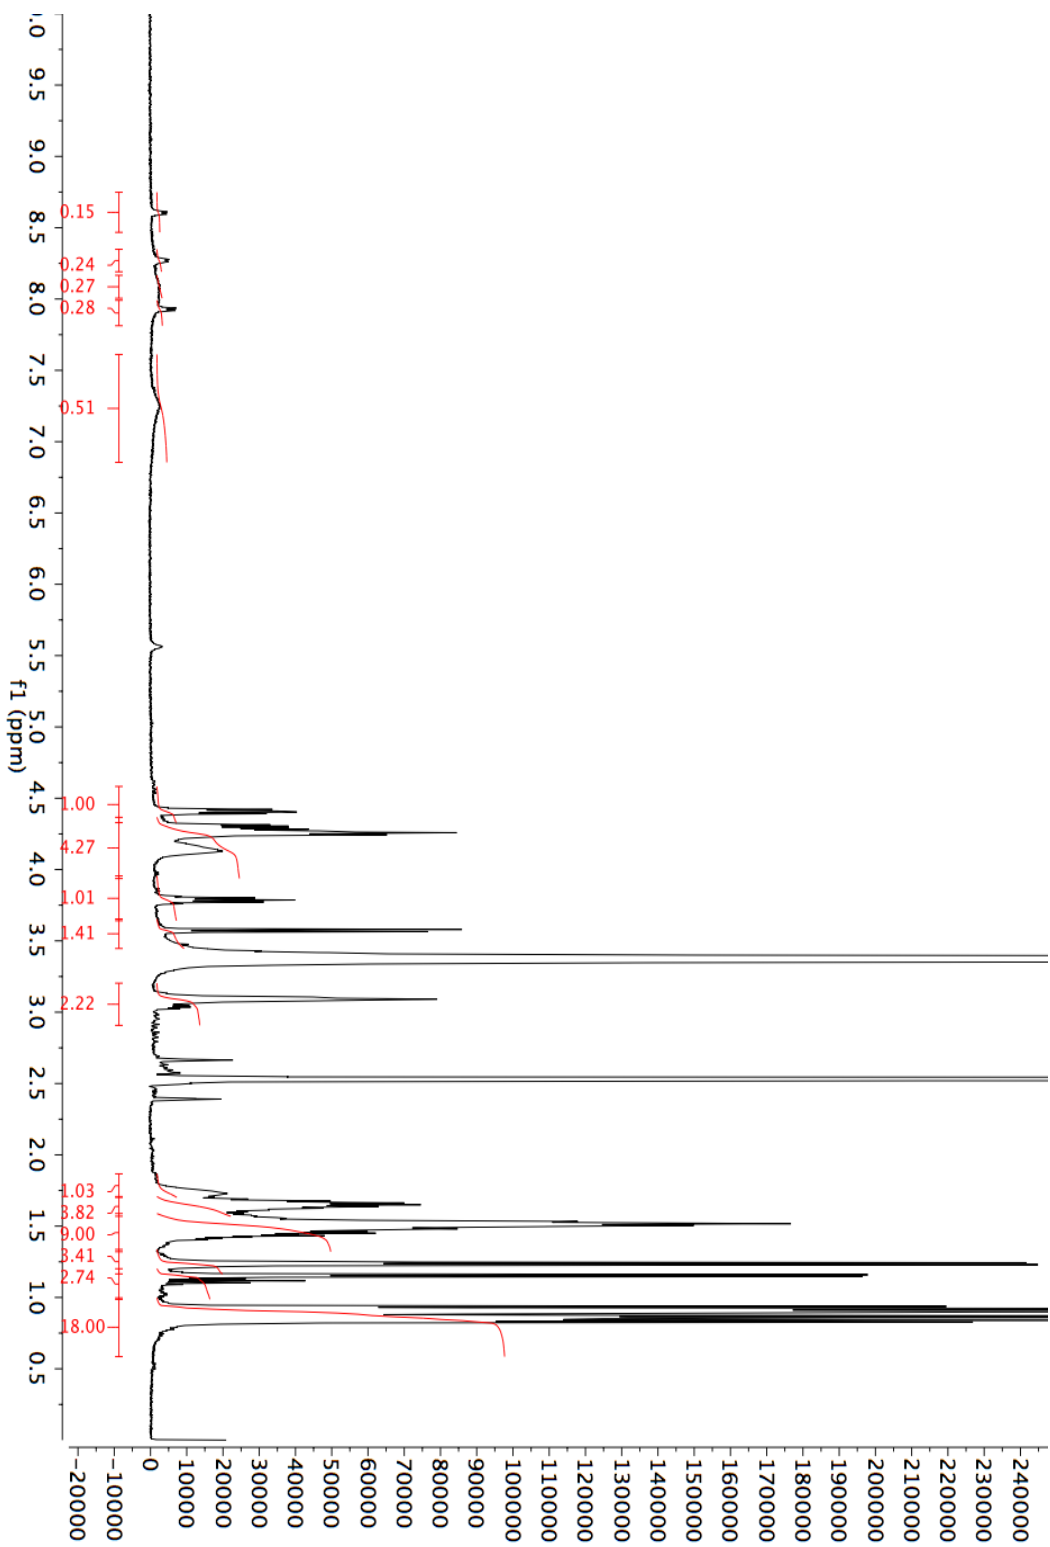

**Figure S23.** <sup>1</sup>H NMR spectrum for peptide L1.2.

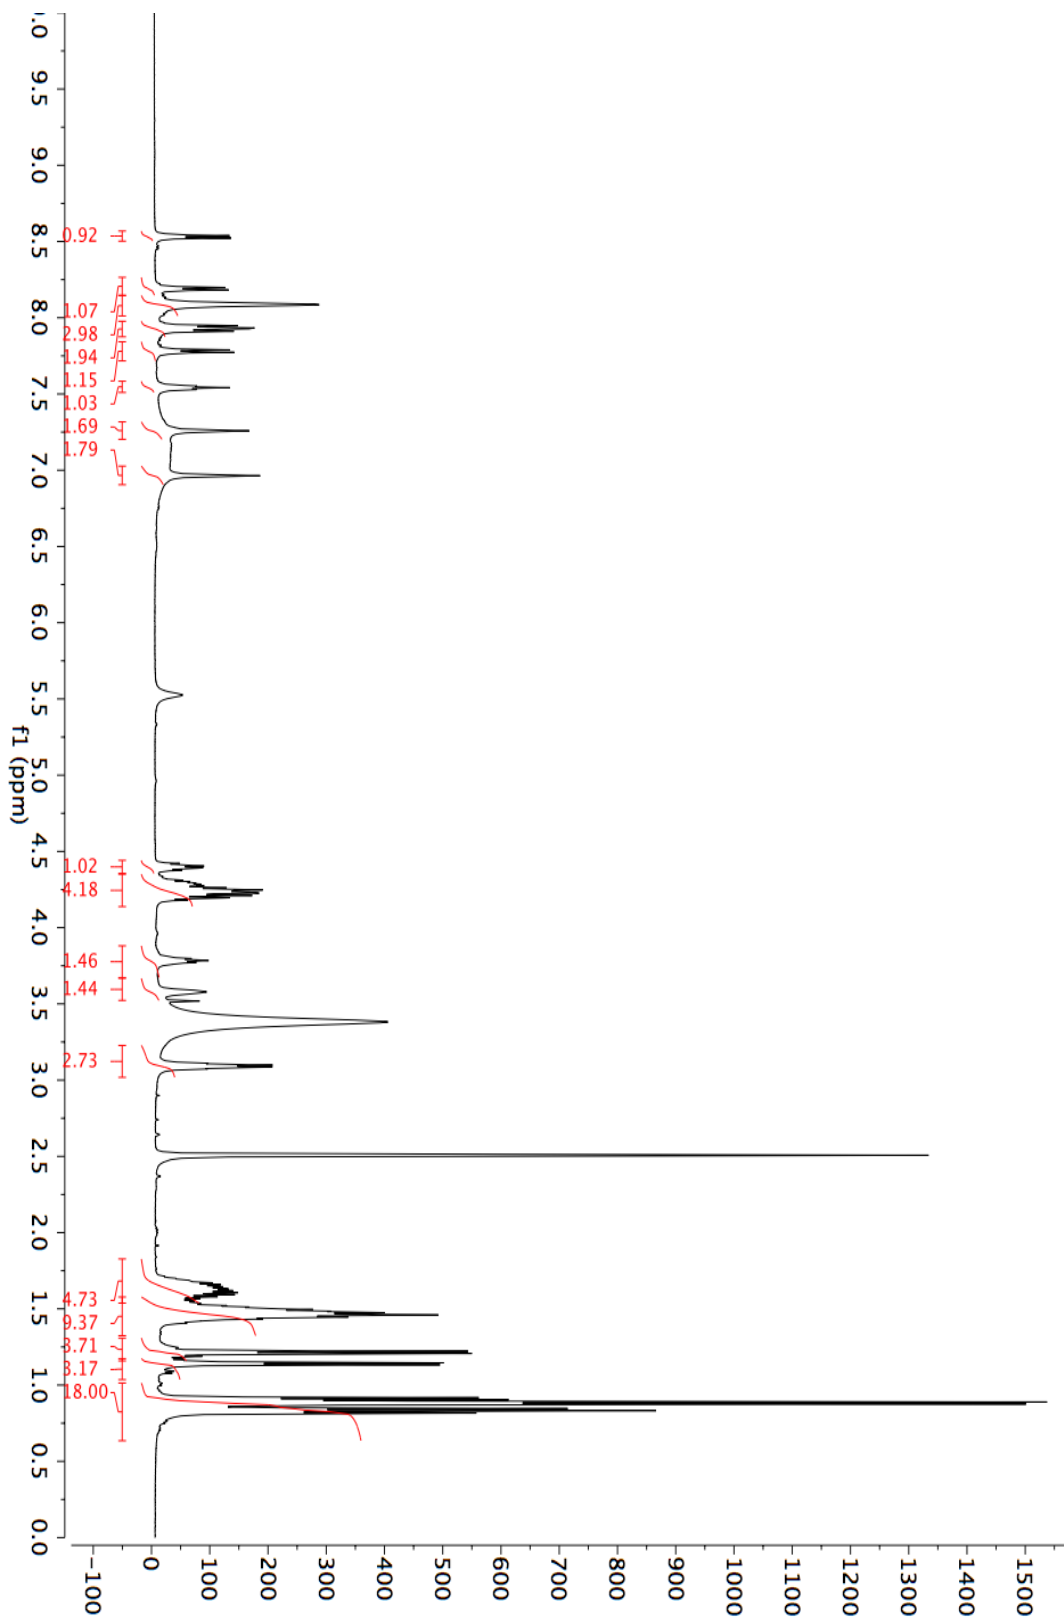

Figure S24.  $^1\text{H}$ NMR spectrum for peptide L1.3.

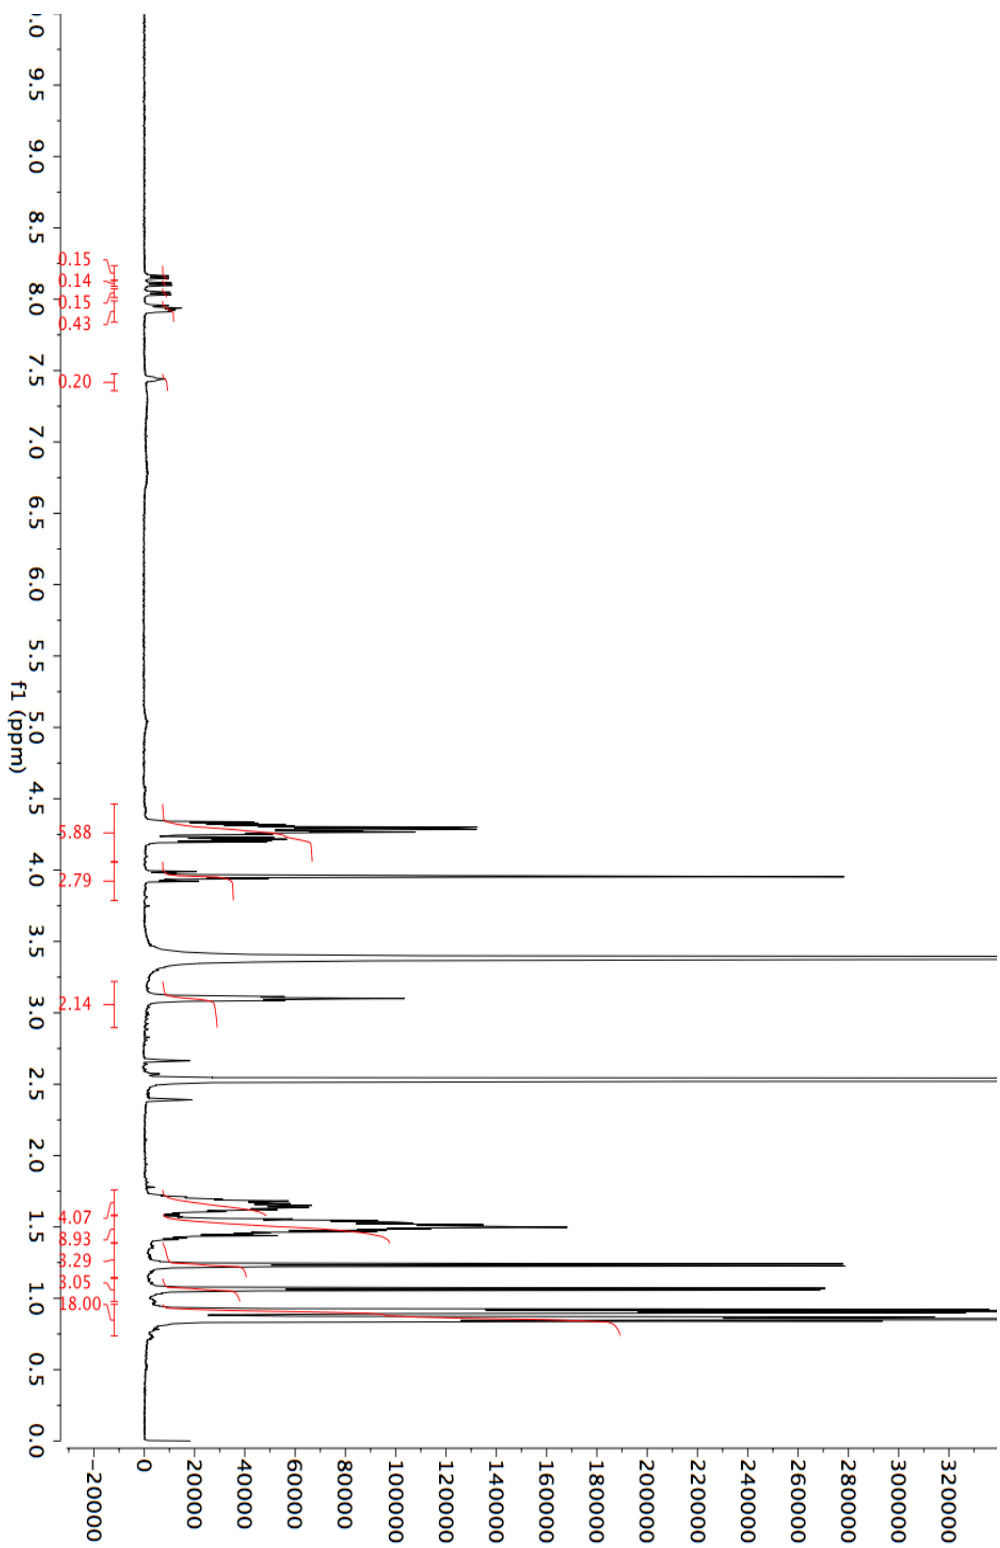

Figure S25. <sup>1</sup>H NMR spectrum for peptide L1.4.

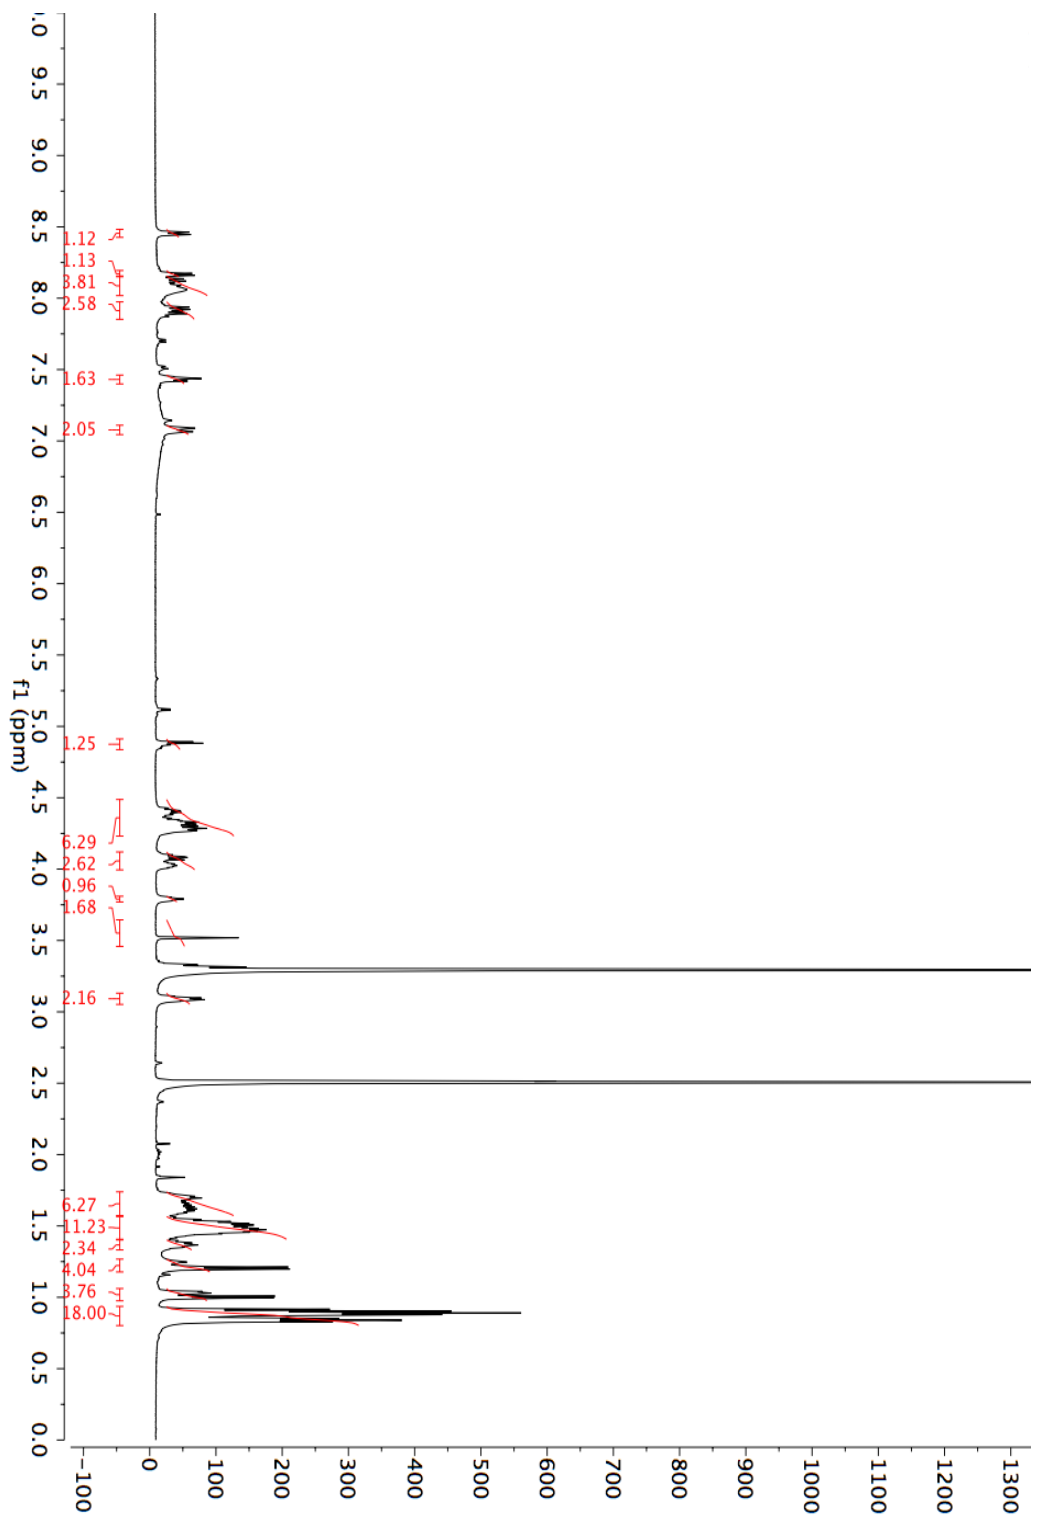

Figure S26. <sup>1</sup>H NMR spectrum for peptide L1.5.



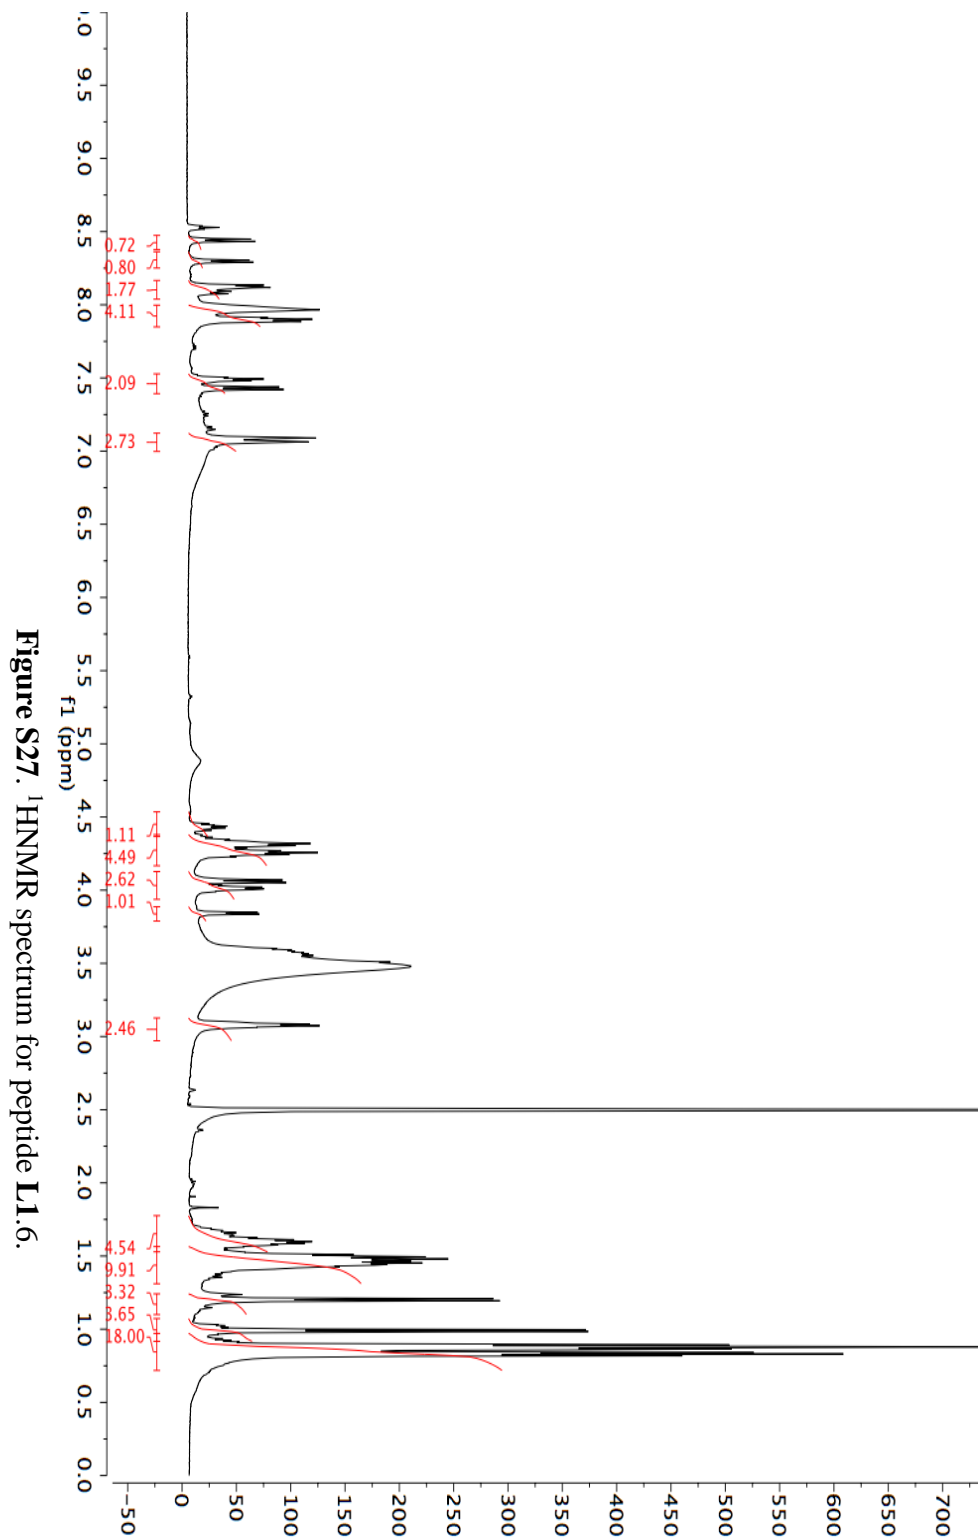

Figure S27. <sup>1</sup>H NMR spectrum for peptide L1.6.

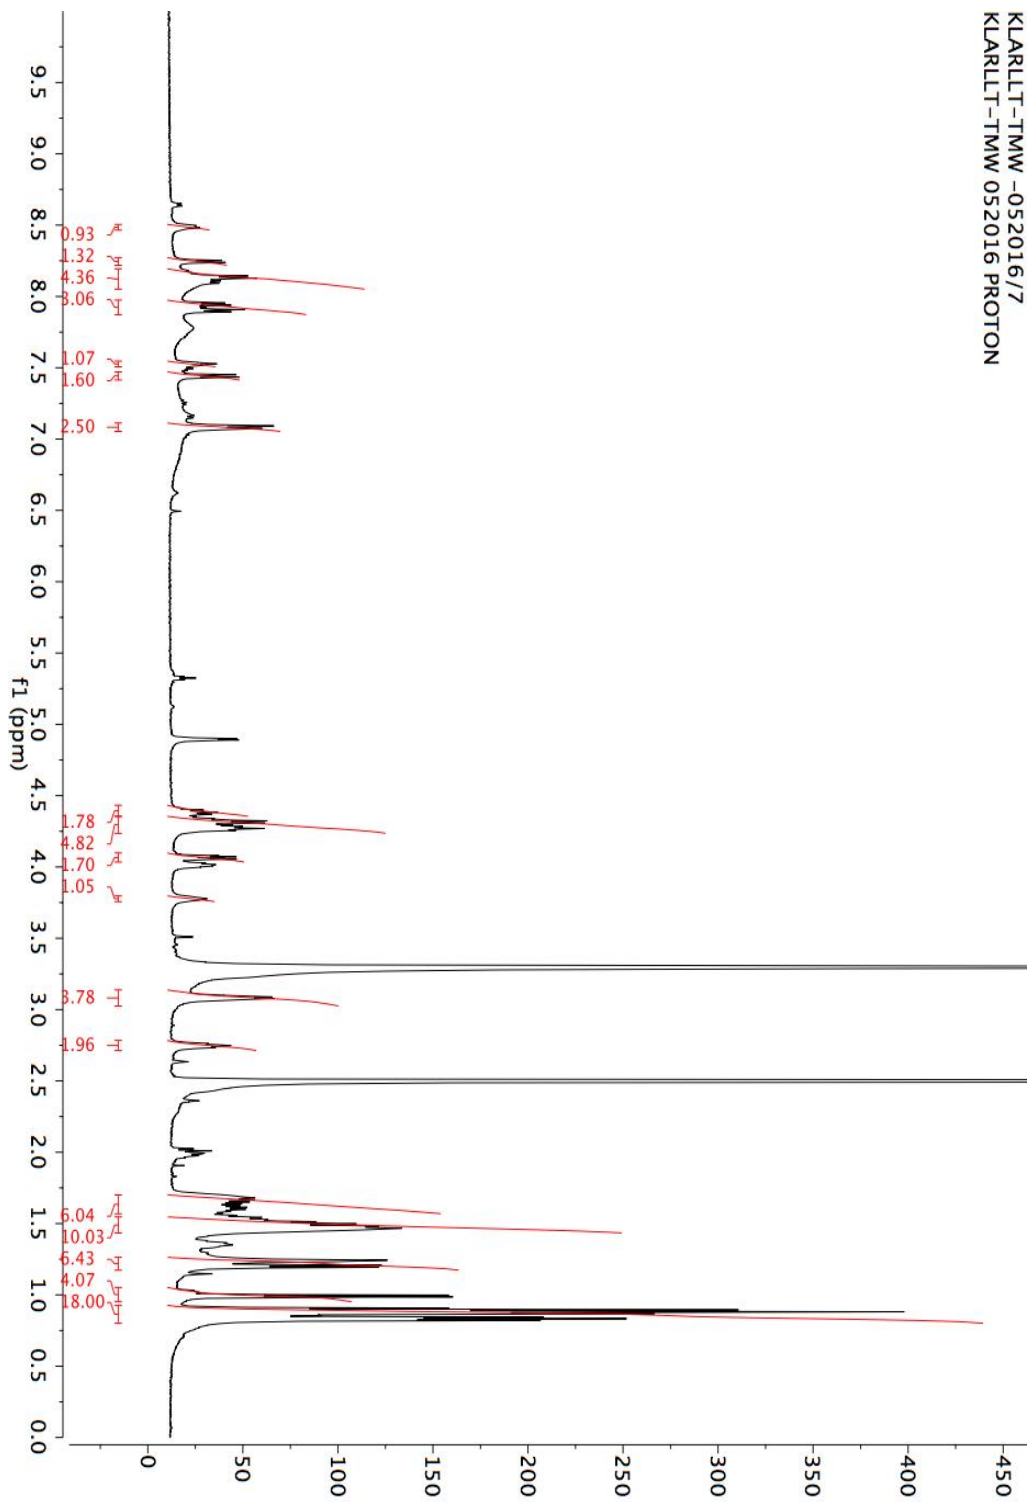

Figure S28. 1H NMR spectrum for peptide L1.7.

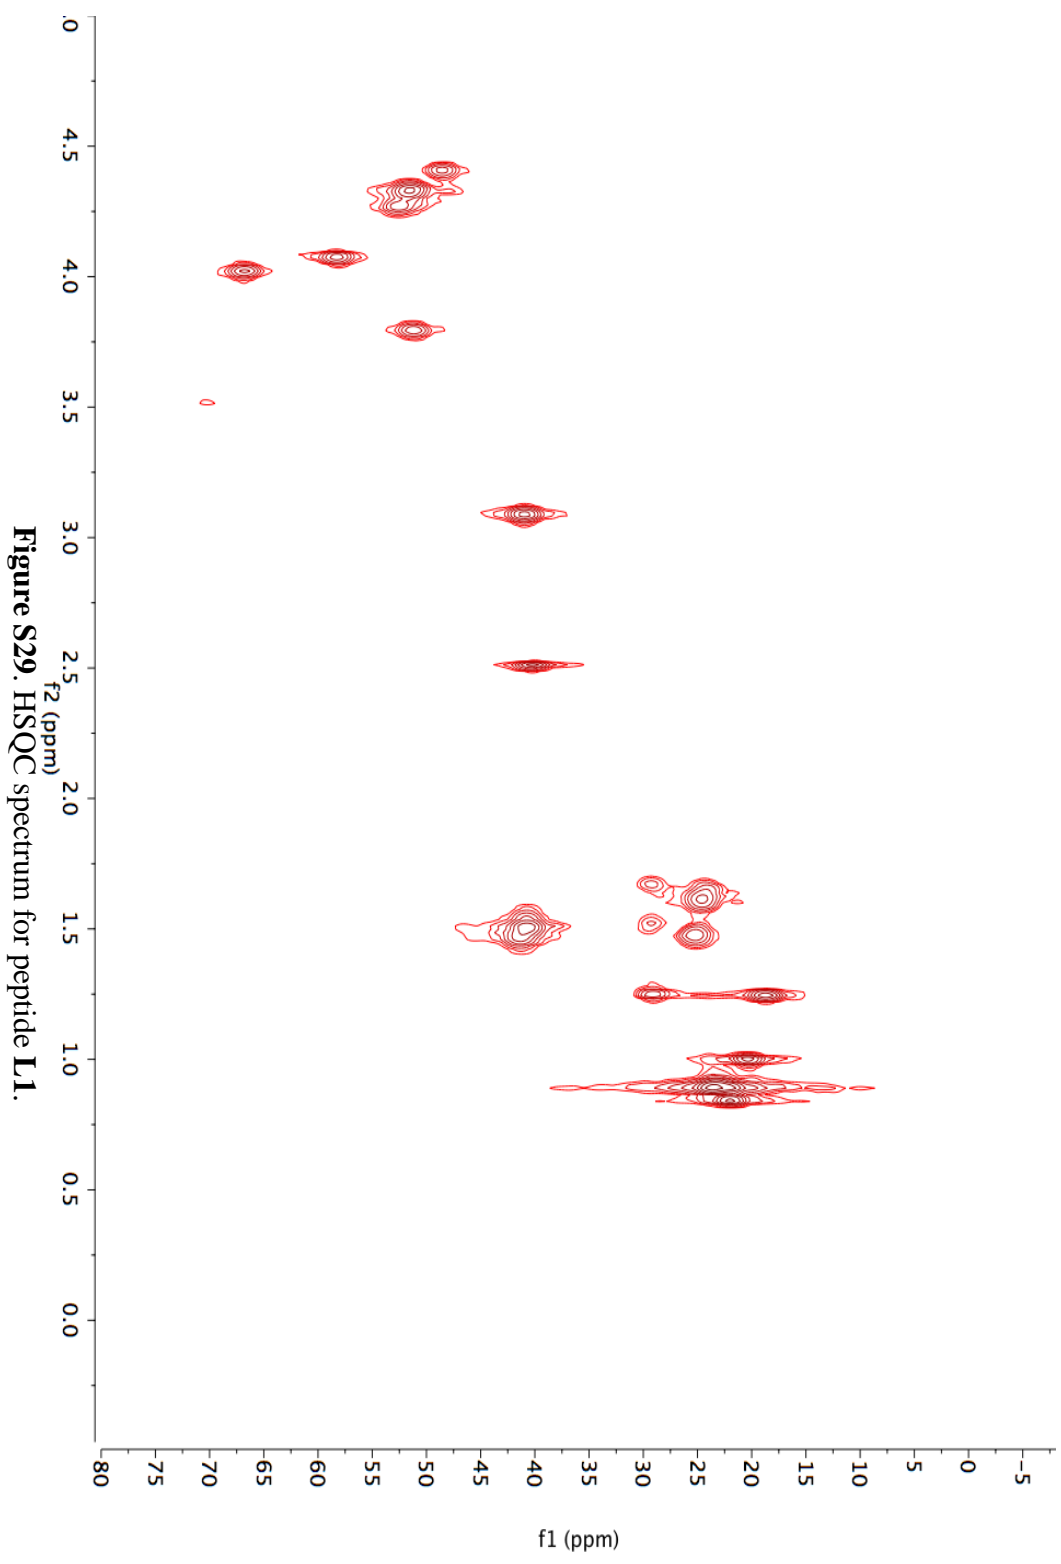

**Figure S29.** HSQC spectrum for peptide L1.

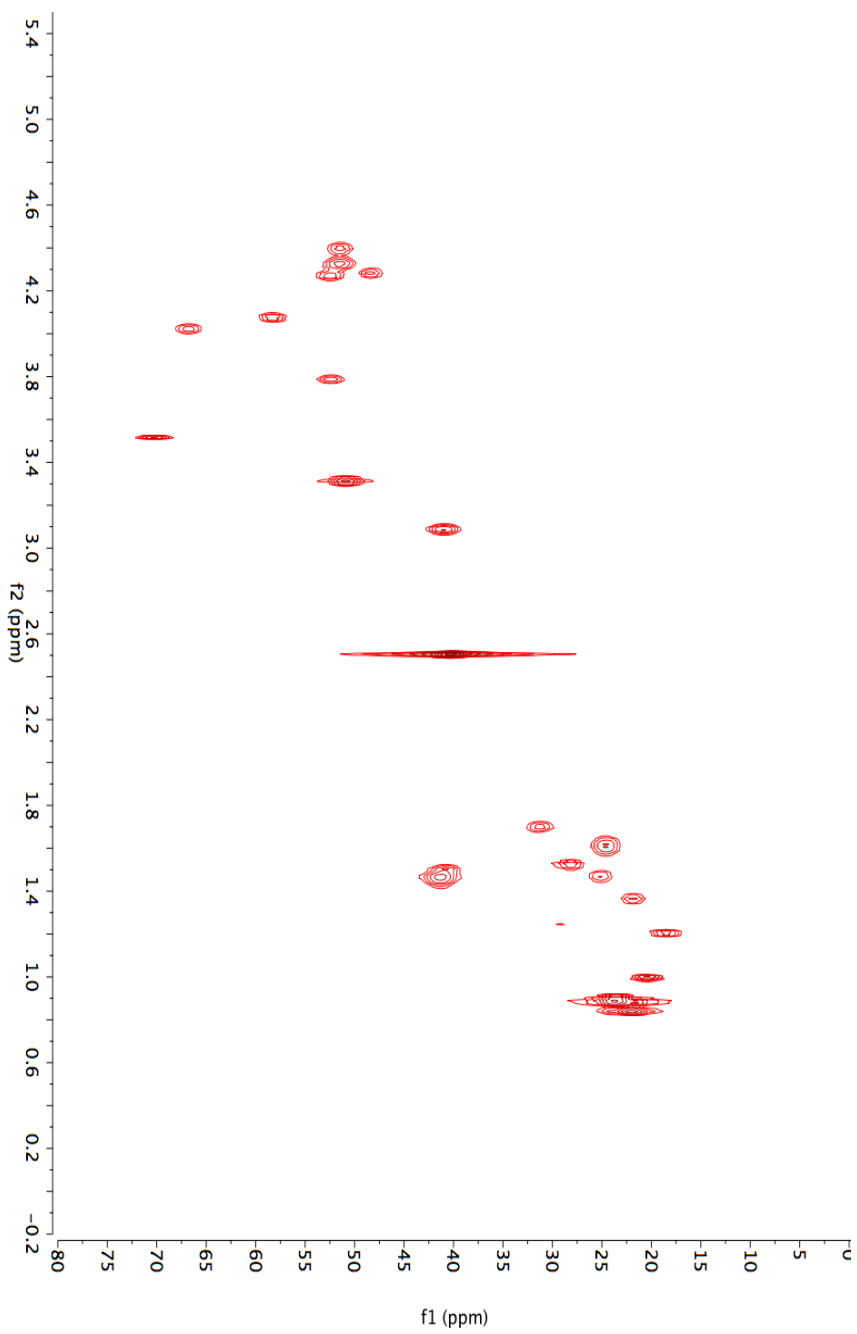

**Figure S30.** HSQC spectrum for peptide L1.5.

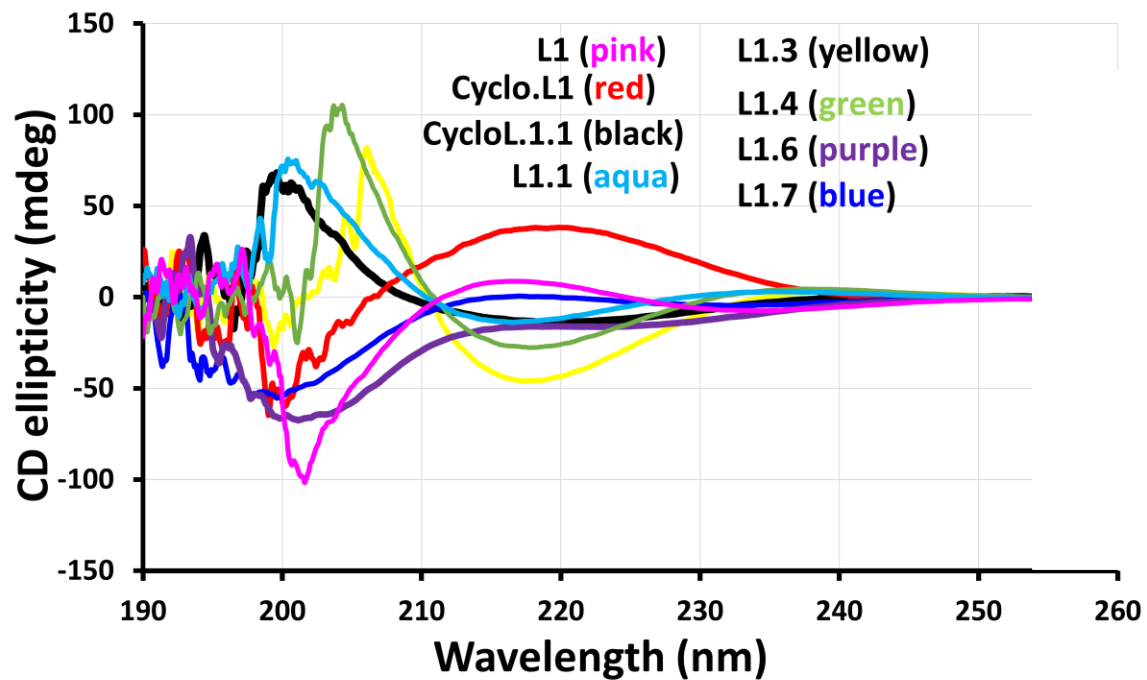

**Figure S31.** CD spectra of linear and cyclic peptides in methanol. 1 mg/mL of peptide was dissolved in methanol and CD spectra was acquired at 25 °C, and the spectra were average of 4 scans.
